1       **(A) Title:** Age is Associated with Dampened Circadian Patterns of Rest and Activity: The  
2           Study of Muscle, Mobility and Aging (SOMMA)

3       **(B) Authors:** Melissa L. Erickson, PhD<sup>1</sup>, Terri L. Blackwell, MA<sup>2</sup>, Theresa Mau, PhD<sup>2,3</sup>,  
4           Peggy M. Cawthon, PhD, MPH<sup>2,3</sup>, Nancy W. Glynn, PhD<sup>4</sup>; Yujia (Susanna) Qiao, PhD<sup>2</sup>,  
5           Steven R. Cummings, MD<sup>2,3</sup>, Paul M. Coen, PhD<sup>1</sup>; Nancy E. Lane, MD<sup>5</sup>; Stephen B.  
6           Kritchevsky, PhD<sup>6</sup>, Anne B. Newman, MD, MPH<sup>4</sup>, Samaneh Farsijani, PhD, RD<sup>4</sup>, Karyn  
7           A. Esser, PhD<sup>7</sup>

8       **(C) Affiliations:**

9           <sup>1</sup>Translational Research Institute, AdventHealth, Orlando, FL

10          <sup>2</sup>San Francisco Coordinating Center, California Pacific Medical Center Research  
11          Institute, San Francisco, California, USA

12          <sup>3</sup>Department of Epidemiology and Biostatistics, University of California, San Francisco,  
13          California, USA

14          <sup>4</sup>Department of Epidemiology, University of Pittsburgh, Pittsburgh, Pennsylvania, USA

15          <sup>5</sup>Department of Rheumatology, University of California, Davis

16          <sup>6</sup>Department of Internal Medicine-Gerontology and Geriatric Medicine, Wake Forest  
17          University School of Medicine, Winston-Salem, North Carolina, USA

18          <sup>7</sup>Department of Physiology and Aging, University of Florida College of Medicine,  
19          Gainesville Florida

20       **(D) Corresponding Authors:** Melissa L. Erickson; [Melissa.L.Erickson@AdventHealth.com](mailto:Melissa.L.Erickson@AdventHealth.com)  
21           and Karyn A. Esser, [kaesser@ufl.edu](mailto:kaesser@ufl.edu)

22       **(E) Main Text Word Count:** 3,015

23       **(F) Number of Data Elements:** 1 Table and 4 Figures

24 **Abstract**

25 **Background:** Aging is associated with declines in circadian functions. The effects of aging on  
26 circadian patterns of behavior are insufficiently described. We characterized age-specific  
27 features of rest-activity rhythms (RAR) in community dwelling older adults, both overall, and in  
28 relation, to sociodemographic characteristics.

29 **Methods:** We analyzed baseline assessments of older adults with wrist-worn free-living wrist-  
30 worn actigraphy data (N=820, Age=76.4 yrs, 58.2% women) participating in the Study of  
31 Muscle, Mobility and Aging (SOMMA). We applied an extension to the traditional cosine curve  
32 to map RAR to activity data, calculating the parameters: rhythmic strength (amplitude);  
33 robustness (pseudo-F statistic); and timing of peak activity (acrophase). We also used function  
34 principal component analysis to determine 4 components describing underlying patterns of  
35 activity accounting for RAR variance. Linear models were used to examine associations  
36 between RAR and sociodemographic variables.

37 **Results:** Age was associated with several metrics of dampened RAR; women had stronger and  
38 more robust RAR metrics vs. men (all  $P < 0.05$ ). Total activity (56%) and time of activity (20%)  
39 accounted for most the RAR variance. Compared to the latest decile of acrophase, those in the  
40 earliest decile had higher average amplitude ( $P < 0.001$ ). Compared to the latest decile of  
41 acrophase, those in the earliest and midrange categories had more total activity ( $P=0.02$ ). RAR  
42 was associated with some sociodemographic variables.

43 **Conclusions:** Older age was associated with dampened circadian behavior; and behaviors were  
44 sexually dimorphic. We identified a behavioral phenotype characterized by early time-of-day of  
45 peak activity, high rhythmic amplitude, and more total activity.

46 **Key Words:** aging, circadian clock, circadian rhythms, physical activity, longevity, SOMMA

47 **Introduction**

48 Aging is characterized by declines in physical function and mobility. The determinants  
49 of these changes are still under investigation. Numerous aging biological processes have been  
50 linked to circadian timing, patterns, or rhythms and, thus, the role of circadian biology in age-  
51 related changes is now being considered(1). Circadian rhythms are approximate 24hr patterns in  
52 behavior and physiology that are regulated by molecular clock mechanisms found in virtually all  
53 cells in the body. Endogenous circadian clocks confer benefit to an organism by supporting  
54 homeostasis and resilience, and this ultimately promotes longevity and healthy aging(2-4).  
55 Mounting evidence suggests that aging itself is characterized by weakened circadian functions(5,  
56 6). In addition, there is a growing interest in linking circadian timing to interventions for healthy  
57 aging, including diet(7) and physical activity(8). Nonetheless, there is a need to first establish  
58 the fundamental relation between aging and circadian biology.

59 One observable aspect of circadian biology is the repeated, rhythmic change in rest and  
60 activity behaviors. These behavioral circadian patterns are measurable in humans, in free-living  
61 settings, with wearable activity monitors(9). Specifically, rest-activity data obtained from such  
62 monitors worn for several consecutive days, can be mathematically assessed for a daily circadian  
63 rhythm; and the shape of these rhythmic patterns may reveal insight into health and disease  
64 status. For example, a remarkably consistent observation across numerous cohort studies is that  
65 a dampened rhythmic amplitude is associated with age-related chronic conditions and  
66 pathologies, including changes in cognitive functioning, signs of Alzheimer’s disease, fatigue,  
67 markers of inflammation, reduced cardiometabolic and bone health, and even mortality (10-20).  
68 While these relationships between altered rest-activity rhythms and disease outcomes are  
69 striking, what remains unaddressed is the impact of aging itself on rest-activity patterns.

70 In addition to the features of rest-activity patterns, the time-of-day in which activity occurs is  
71 gaining attention as a new parameter of physical activity that is important to health. Studies have  
72 reported associations between times of day when activity is performed (e.g. morning, afternoon,  
73 or evening) with outcomes that are relevant for age-related chronic diseases, such as obesity,  
74 metabolic function, type 2 diabetes, cardiovascular risk, and all-cause mortality(21-25). These  
75 findings support an emerging concept of circadian timing of physical activity for health benefit.  
76 The circadian patterns of rest and activity in the context of the 24h day-cycle cycle, and whether  
77 this relates to healthy aging is unknown. The Study of Muscle, Mobility and Aging (SOMMA)  
78 offers opportunity in this regard, enabling large-scale behavior phenotyping of rest-activity  
79 rhythms, as well as determination of the temporal distribution of activity in a cohort of older  
80 adults (70 to 85+ yrs), free of life-threatening illnesses, did not suffer from mobility disability,  
81 and inclusive of men and women(26), which has not been done previously.

82 The purpose of this study was to determine age-specific features of circadian patterns of rest  
83 and activity behavior, assessed with wearable activity trackers, in a cohort of community  
84 dwelling older adults in the SOMMA cohort(26). In addition to rhythmic parameters, the  
85 temporal distribution of physical activity across the 24h day was also characterized. Finally,  
86 associations between parameters of rest-activity-rhythms and demographic variables were  
87 examined.

## 88 **Methods**

### 89 *Study Cohort and Design*

90 From April 2019 to December 2021, participants aged 70 and older were recruited from 2  
91 clinical sites—the University of Pittsburgh and Wake Forest University School of Medicine for  
92 the Study of Muscle, Mobility and Aging (SOMMA) (<https://sommaonline.ucsf.edu>). The  
93 unique cohort study design of SOMMA has been previously described elsewhere (26). Briefly,  
94 individuals were eligible to participate if they were 70 years old or older, willing and able to  
95 complete a skeletal muscle biopsy and undergo magnetic resonance (MR). Individuals were  
96 excluded if they reported an inability to walk one-quarter of a mile or climb a flight of stairs; had  
97 body mass index (BMI)  $\geq 40$  kg/m<sup>2</sup>; had an active malignancy or dementia; or any medical  
98 contraindication to biopsy or MR. Finally, participants must have been able to complete the 400-  
99 meter walk; those who appeared as they might not be able to complete the 400-meter walk at the  
100 in-person screening visit completed a short distance walk (4 meters) to ensure their walking  
101 speed as  $\geq 0.6$  m/s. SOMMA was approved by the Western IRB-Copernicus Group (WCG)  
102 Institutional Review Board (WCGIRB, study number 20180764). All participants provided  
103 written informed consent. This current study used baseline SOMMA data for cross-sectional  
104 assessments.

105

### 106 *Demographic Variables*

107 Data collected included age based on self-reported date of birth, self-reported gender, and  
108 race and self-reported ethnicity based on current census categories. Data on work schedule,  
109 education level and finances were gathered. Data on behavior and lifestyle were collected (e.g.,  
110 smoking status, marital status), self-reported health status and medical history. Multimorbidity

111 was classified using a modification to the Rochester Epidemiology Project multimorbidity scale  
112 (0-13) (27). Height was measured by stadiometers and weight by balance beam or digital scales.  
113 Body mass index (BMI) was then calculated as weight (kg)/height (m<sup>2</sup>).

114

#### 115 *Actigraphy*

116 Actigraphy data was collected using the ActiGraph GT9X (ActiGraph, Pensacola, FL),  
117 which has a 3-axis accelerometer with a sampling rate of 80 Hertz. ActiGraph GT9X is a watch-  
118 like device placed on a participant's nondominant wrist in person at a clinic visit. Participants  
119 were asked to wear the Actigraph continuously for 7 days(28). Data were processed in one-  
120 minute epochs (activity counts/minute) and scored using ActiGraph Corp's ActiLife Software.  
121 The first day of wear was excluded from these analyses, as participants were required to do a  
122 number of physical performance tests during their clinic visit and the activity level may not be  
123 representative of their usual activity patterns. Sleep diaries were used to aid in setting intervals  
124 for when the participants were in bed trying to sleep. Nonwear time was determined by a  
125 combination of an off-wrist detector in the device, a nonwear algorithm, and review by an  
126 actigraphy data scorer(28, 29). Nonwear times were set to missing. The Cole-Kripke sleep  
127 scoring algorithm was used to determine sleep from wake(30). Total sleep time during the in-bed  
128 interval was averaged over all nights of wear, to obtain a more representative characterization of  
129 usual sleep patterns. Total activity count per 24-hour day was also averaged over all days to get  
130 an estimate of overall activity level.

131

#### 132 *Rest-Activity Rhythm Parameters*

133           The activity data gathered was used to calculate both parametric and non-parametric  
134 RAR variables. The parametric approach assumes the activity data has an underlying  
135 distribution similar to the cosine curve. The nonparametric approach does not assume RAR fit to  
136 a cosine wave *a priori* but rather fits to regular pattern of activity.

137           Parametric Approach: A 5-parameter extension to the traditional 24-hr cosine curve was  
138 used to map the RAR to activity data. This extension allows for a more squared-shape wave than  
139 a cosine curve, as often observed with activity data (31). The RAR parameters include the  
140 following: amplitude, which is an indicator of the strength of the rhythm, calculated as the peak  
141 to nadir difference in activity (units of activity [counts/min]); midline (midpoint between the  
142 rhythmic maximum and minimum), estimating statistic of rhythm (mesor), which is the mean  
143 level of activity (units of activity [counts/min]); robustness of the RAR, or pseudo-F statistic for  
144 goodness of extended cosine fit, with higher values indicate stronger rhythms; and acrophase,  
145 which is the timing of peak activity of the fitted curve, measured as time of day (portions of  
146 hours).

147           Non-Parametric Approach: Inter-day stability (IS), which describes day-to-day stability  
148 of RAR (range 0 to 1); and intra-daily variability (IV) which describes fragmentation across 24h  
149 ranges (range 0 to 2); the average activity level of the most active consecutive 10-hour period  
150 (M10); the average activity of the least active consecutive 5-hour period (L5); relative amplitude  
151 (RA), the difference in activity between M10 and L5 in the average 24-hour pattern, normalized  
152 by their sum, with higher RA reflecting relatively lower activity during the night and greater  
153 activity when awake (32, 33).

154           Functional Principal Component Analysis (fPCA): We also used fPCA to describe  
155 underlying patterns of activity, as this analytical approach does not rely on *a priori* assumptions

156 about the activity shape. Participant data was fit with a nine-Fourier-based function. fPCA was  
157 then used to derive the top four components determined as these typically explain the majority of  
158 the variance, and an eigenvalue was assigned for each of the four components and each  
159 participant(34, 35).

160 Temporal Distribution of Physical Activity: The average of activity level across all  
161 participants by clock time were plotted, stratified by acrophase category. Participants were  
162 categorized as having early timing if they fell within the lowest decile of acrophase, midrange for  
163 those 10% of participants around the median value, and late timing as those in the highest decile  
164 of acrophase.

165

## 166 **Statistical Analysis**

167 Cohort characteristics were categorized and described using proportions (N% of). RAR  
168 parameters were described using means and standard deviations. Associations of each  
169 characteristic with the RAR parameters was examined using linear regression models, with  
170 results presented as adjusted means and their 95% confidence intervals. For characteristics with  
171 more than 2 categories, tests for a linear trend across categories were performed by including  
172 each characteristic (ordinal variable) as an independent variable in models. Tests were also  
173 performed comparing categories to the reference. Minimally adjusted models included the  
174 characteristic and an adjustment for clinic site. Multivariable adjusted models included clinic site  
175 and all characteristics examined in the same model, to determine if adjustment for other  
176 characteristics attenuated any associations observed.



177           We explored differences in associations by sex by performing formal tests for interaction  
178 with sex and each characteristic with linear regression models that included clinic site, the  
179 characteristic, sex, and a term for sex\*characteristic.

180           Total activity level across categories of acrophase used to describe the temporal  
181 distribution of activity were compared using t-tests, comparing the participants in the midrange  
182 group to those in the lowest and highest decile of acrophase. In addition, area-under-the-curve  
183 (AUC) for the graphical representation of average activity stratified by category of acrophase  
184 was calculated using the trapezoidal rule.

185           All significance levels reported were two-sided and all analyses were conducted using  
186 SAS version 9.4 (SAS Institute Inc, Cary, NC).

187

188

189  
190  
191  
192  
193  
194  
195  
196  
197  
198  
199  
200  
201  
202  
203  
204  
205  
206  
207  
208  
209  
210  
211

## Results

### *Participants*

Of the 879 participants enrolled in SOMMA, our analytic subset consists of 820 participants with actigraphy data. Some participants (n=59) missing or excluded were due to several reasons; either the participant wore the device but there was a malfunction with the datafile (n=33), no device was available (n=12), the participant refused (n=1), the participant was unable (n=1), the actigraphy file did not have activity data in the correct format (n=9) or had too little data collected (n=3). The 820 men (41.8%) and women (58.2%) were on average 76.4 years old, had a BMI of 27.6 kg/m<sup>2</sup>, and mostly identified as White (85.0%). Most (62.0%) graduated from college and about half were in a married-like relationship. Most (61.6%) reported very good or excellent health compared to others their age and 83.3% reported a history of one or more of the 13 medical conditions in the multimorbidity index. Most said their finances met their needs very well (64.1%) and some (39.4%) reported having a regular work or volunteer schedule (Table 1). Only 20% of participants reported regularly waking with an alarm, and remaining 80% had different self-wake behaviors, potentially indicating that they were not constrained by scheduled requirements. The participants on average slept 6 hours, 51 minutes  $\pm$  61 minutes.

### *Parametric and Non-Parametric Rest-Activity Rhythmic Parameters*

Representative examples of rest-activity rhythms are shown in Figure 1. On average, participants wore the ActiGraph for  $8 \pm 0.8$ , 24-hr periods. The average acrophase was at 2:19 PM. The average IS and IV were 0.58 and 0.59, respectively (Table 1, Supplemental Figure S1).

### *Function Principal Component Analysis*

212 The four components of the fPCA analysis explained 91% of the variance in the activity  
213 data. The first component primarily described overall activity level (fPCA1: 56% of the  
214 variance), the second component primarily described timing of activity (fPCA2: 20% of the  
215 variance), the third component primarily described a lower level of midday activity (fPCA3: 9%  
216 of the variance), and the fourth component primarily differentiated between a morning activity  
217 peak and an afternoon peak (fPCA4: 6% of the variance). Figure 2 shows the plots of activity  
218 level for the average of the cohort, those with positive eigenvalues and those with negative  
219 eigenvalues for each of the 4 fPCA.

220

#### 221 *Associations Between RAR Parameters*

222 Measures that are primarily related to activity level from the 3 approaches of defining  
223 RAR were highly correlated to each other ( $r > 0.50$  for amplitude, mesor, M10, fPCA component  
224 1; Supplemental Figure 1). Acrophase and fPCA component 2, both measures of timing were  
225 correlated at  $r = 0.75$ . Measures of rhythm robustness or fragmentation were also highly correlated  
226 ( $abs(r) > 0.64$  for pseudo F-statistic, IS, IV; Supplemental Figure S2).

227

#### 228 *Associations of RAR Parameters with Demographic Variables*

229 In models adjusted for clinic site alone, age was primarily related to parameters that are  
230 driven by activity level and strength of rhythm, in which younger participants had higher average  
231 values of amplitude, mesor, M10, and fPCA1; lower values of IV. Sex was primarily related to  
232 the strength of patterns of activity (pseudo f-statistic, IS, IV, M10, RA, fPCA1, fPCA2). Figure 3  
233 shows sex differences in parametric and non-parametric parameters. Race was not related to any  
234 shape-based parameters, but was related to nonparametric measures, with those identifying as

235 White having higher stability (IS), lower variability (IV) and lower L5 (Table 1, Supplemental  
236 Table 1).

237 The most consistent association seen was that of marital status and RAR (Table 1,  
238 Supplemental Table 1). Being in a married-like relationship was associated with more robust  
239 rhythms as seen by the parametric parameters, more stability of activity (IS), lower levels of L5,  
240 implying more consolidated sleep, and higher M10 (more active while out of bed). Those with  
241 higher education level had less strength of rhythm (pseudo f-statistic, IV, L5, RA). Financial  
242 situation was related to timing of activity and strength of rhythm (acrophase and pseudo f-  
243 statistic), and most nonparametric measures (IS, L5, M10, RA, fPCA1, fPCA2). The associations  
244 of work were primarily activity level based (amplitude, M10, fPCA1). Reporting poor/good  
245 health status was primarily related to lower average activity levels. There were no associations  
246 observed between smoking or the multimorbidity index and RAR parameters.

247 Associations seen in the site-adjusted models remained statistically significant for most  
248 demographic variables after combining all demographic variables in one model, with some  
249 attenuation of effect size (Supplement Tables 2A, B, C). The demographic variables most  
250 affected by adjustment for other variables examined were work schedule and self-reported health  
251 status.

252 There were very few significant interactions between sex and other demographic  
253 variables. There were no significant interactions of sex seen with age, race, education, financial  
254 security, self-reported health status or smoking ( $P > 0.05$ ). The interaction of sex with the  
255 multimorbidity index was significant for amplitude and fPCA1 ( $P < 0.05$ ), but associations were  
256 not statistically significant after stratification by sex.

257

258 *Temporal Distribution of Activity*

259 As described above, acrophase is the time of day of peak activity. Figure 4 shows plots  
260 of the average of activity across the day for all participants by category of acrophase. Those with  
261 the earlier acrophase (<12:43 PM) had the highest peak activity and a sharp decline later in the  
262 evening. Those with the latest acrophase (>3:55 PM) had more activity in the evening (11PM to  
263 2 AM). Compared to the latest decile of acrophase, those in the earliest decile of acrophase had  
264 a 70% higher average amplitude ( $P < 0.001$ ).

265 The AUC of the plots show that average activity is similar for those in the earliest and  
266 midrange acrophase categories (Figure 4, Panel A: 32648.15 vs. 33752.31); whereas those in the  
267 latest category of activity timing had a lower AUC (30117.93). Women had a higher AUC than  
268 men (midrange timing category: 34891.61 vs. 31634.91).

269 Total activity was compared among the three acrophases. The average activity level of  
270 those in the midrange category of acrophase was  $203.75 \pm 46.67$  counts\*10,000. Compared to  
271 those in the midrange groups of acrophase, on average, those in the earliest acrophase category  
272 had a similar 24-hr activity level ( $197.27 \pm 53.78$  counts\*10,000,  $P = 0.41$ ), while those in the  
273 latest acrophase category had lower 24-hr activity level compared to those in the midrange group  
274 ( $183.68 \pm 62.91$  counts\*10,000;  $P = 0.02$ ).

275

276

## Discussion

277           The primary finding of this study was that older age was associated with several metrics  
278 of dampened rest-activity rhythms. This is in agreement with findings from a large cohort study  
279 representative of the general population, from the National Health and Nutritional Examination  
280 Survey (NHANES), which primarily focused on younger age categories (20-39, 40-59,  $\geq 60$  yrs)  
281 (36). We also observed sexual dimorphism in circadian behavior, in that women had stronger  
282 and more robust rest-activity rhythms compared to men. This finding is also consistent with two  
283 previous large cohort studies, representative of the general population (NHANES and United  
284 Kingdom Biobank) (36, 37). As SOMMA focused on older adults, our observations herein  
285 indicate that sex-specific differences in circadian behavior may persist beyond reproductive  
286 potential, which has not been previously demonstrated. Despite this sexual dimorphism, there  
287 was lower rhythmic strength at higher age in both men and women, perhaps supporting the  
288 notion that age is a central determinant of circadian patterns of behavior. Although this was a  
289 cross-sectional analysis, our findings of dampened circadian rest-activity rhythms in older adults,  
290 suggests that these changes are likely paralleled by age-related declines in function, mobility,  
291 and energy. Future studies to disentangle cause and effect are warranted.

292           Function principal component analysis revealed that the two primary components  
293 explained a majority of the variance in activity profiles. The first component was overall activity  
294 (56%), in which a higher value corresponds with higher activity throughout the day. The second  
295 component was time of activity (20%), which corresponds with activity timing (e.g early vs. later  
296 “rises”. These findings are very similar to that observed in NHANES, which reported that  
297 variance in activity profiles was also primarily explained by overall activity (50%) and timing of  
298 activity (21%)(38). The consistency between SOMMA and NHANES cohorts, which, as noted

299 above focused on different age ranges, suggests that patterns of activity profiles are generally  
300 preserved from middle to older age.

301 To better understand activity patterns within the context of the 24h day-night timescale,  
302 we investigated the temporal distribution of physical activity. This analysis yielded new insight,  
303 in that those with the earliest time-of-day of peak activity (<12:43 PM) had a higher rhythmic  
304 peak; whereas, those with the latest time-of-day of peak activity (>3:55 PM) had a lower  
305 rhythmic peak. This is the first time, of which we are aware, to describe this behavior  
306 phenotype. There appears to be a relation between time-of-day of activity and total daily  
307 activity, as those in the earliest and midrange categories performed more total activity compared  
308 to those in the latest category of activity timing. Based on these observations, one might suspect  
309 that a strong and robust circadian pattern of activity facilitates the accumulation of more total  
310 daily activity. Although speculative, perhaps this is one way in which circadian rhythms enable  
311 higher levels of physical activity, which in turn promotes healthy aging.

312 In addition to age and sex, there were some significant associations with rhythmic  
313 parameters and sociodemographic variables. Being in a married-like relationship was associated  
314 with stronger and more robust rhythms, higher education was associated with less rhythm  
315 strength, and financial situation was associated with timing of activity and rhythm strength.  
316 Previous analyses from NHANES have reported associations between race/ethnicity and  
317 rhythmic parameters, which were not replicated herein, and this is mostly likely due to  
318 differences in samples sizes of diverse races/ethnicities between study cohorts. However, our  
319 current observations provide additional context, in which some sociodemographic variables, in  
320 addition to age and sex, are associated with rest-activity patterns in community dwelling older  
321 adults.

322  
323  
324  
325  
326  
327  
328  
329  
330  
331  
332  
333  
334  
335  
336

### Conclusion

We found that age was associated with dampened circadian patterns of rest and activity, and this sheds light on a new temporal dimension by which aging impacts physical activity. In addition, women had stronger and more robust rhythms relative to men counterparts. Given the sex gap in longevity and lifespan(39), it is tempting to speculate that strong and robust rhythms in women confers some type of benefit that promotes resiliency or delays aging. We also observed that those active at earlier times in the 24 hour/day had a higher rhythmic peak and more total activity. This may suggest that a strong and robust circadian rhythm facilitates higher levels of, or greater engagement with, physical activity. This novel and comprehensive characterization of rest-activity rhythms in older, community dwelling adults, free of life-threatening disease, lays new groundwork for future hypothesis testing; indeed, future studies that determine how these rest-activity patterns intertwine with function and mobility are warranted.



337 **Conflicts of Interest:** S Cumming and P Cawthon consult for Biolabs. The authors have no  
338 conflicts to interest to report.

339 **Funding:** The Study of Muscle, Mobility and Aging is supported by funding from the National  
340 Institute on Aging, grant number AG059416. Study infrastructure support was funded in part by  
341 NIA Claude D. Pepper Older American Independence Centers at University of Pittsburgh  
342 (P30AG024827) and Wake Forest University (P30AG021332) and the Clinical and Translational  
343 Science Institutes, funded by the National Center for Advancing Translational Science, at Wake  
344 Forest University (UL1 0TR001420). MLE supported in part by K01DK134838.

345

346

## 347 **References**

- 348 1. Acosta-Rodríguez VA, Rijo-Ferreira F, Green CB, Takahashi JS. Importance of circadian  
349 timing for aging and longevity. *Nat Commun.* 2021;**12**:2862.
- 350 2. Lu JY, Simon M, Zhao Y, Ablueva J, Corson N, Choi Y, *et al.* Comparative  
351 transcriptomics reveals circadian and pluripotency networks as two pillars of longevity  
352 regulation. *Cell Metab.* 2022.
- 353 3. Manoogian ENC, Chow LS, Taub PR, Laferrère B, Panda S. Time-restricted Eating for  
354 the Prevention and Management of Metabolic Diseases. *Endocr Rev.* 2022;**43**:405-436.
- 355 4. Acosta-Rodríguez V, Rijo-Ferreira F, Izumo M, Xu P, Wight-Carter M, Green CB, *et al.*  
356 Circadian alignment of early onset caloric restriction promotes longevity in male C57BL/6J  
357 mice. *Science.* 2022;**376**:1192-1202.
- 358 5. Wolff CA, Gutierrez-Monreal MA, Meng L, Zhang X, Douma LG, Costello HM, *et al.*  
359 Defining the age-dependent and tissue-specific circadian transcriptome in male mice. *Cell Rep.*  
360 2023;**42**:111982.
- 361 6. Nakamura TJ, Nakamura W, Yamazaki S, Kudo T, Cutler T, Colwell CS, *et al.* Age-  
362 related decline in circadian output. *J Neurosci.* 2011;**31**:10201-10205.
- 363 7. Panda S, Maier G, Villareal DT. Targeting Energy Intake and Circadian Biology to  
364 Engage Mechanisms of Aging in Older Adults With Obesity: Calorie Restriction and Time-  
365 Restricted Eating. *J Gerontol A Biol Sci Med Sci.* 2023;**78**:79-85.
- 366 8. Lai TF, Liao Y, Lin CY, Huang WC, Hsueh MC, Chan DC. Moderate-to-vigorous  
367 physical activity duration is more important than timing for physical function in older adults. *Sci*  
368 *Rep.* 2020;**10**:21344.
- 369 9. Hood S, Amir S. The aging clock: circadian rhythms and later life. *J Clin Invest.*  
370 2017;**127**:437-446.
- 371 10. Ancoli-Israel S, Liu L, Natarajan L, Rissling M, Neikrug AB, Youngstedt SD, *et al.*  
372 Reductions in sleep quality and circadian activity rhythmicity predict longitudinal changes in  
373 objective and subjective cognitive functioning in women treated for breast cancer. *Support Care*  
374 *Cancer.* 2022;**30**:3187-3200.
- 375 11. Musiek ES, Bhimasani M, Zangrilli MA, Morris JC, Holtzman DM, Ju YS. Circadian  
376 Rest-Activity Pattern Changes in Aging and Preclinical Alzheimer Disease. *JAMA Neurol.*  
377 2018;**75**:582-590.
- 378 12. Liu L, Rissling M, Neikrug A, Fiorentino L, Natarajan L, Faierman M, *et al.* Fatigue and  
379 Circadian Activity Rhythms in Breast Cancer Patients Before and After Chemotherapy: A  
380 Controlled Study. *Fatigue.* 2013;**1**:12-26.
- 381 13. Xu Y, Su S, McCall WV, Wang X. Blunted rest-activity rhythm is associated with  
382 increased white blood-cell-based inflammatory markers in adults: an analysis from NHANES  
383 2011-2014. *Chronobiol Int.* 2022;**39**:895-902.
- 384 14. Paudel ML, Taylor BC, Ancoli-Israel S, Blackwell T, Stone KL, Tranah G, *et al.*  
385 Rest/activity rhythms and mortality rates in older men: MrOS Sleep Study. *Chronobiol Int.*  
386 2010;**27**:363-377.
- 387 15. Hoopes EK, Witman MA, D'Agata MN, Berube FR, Brewer B, Malone SK, *et al.* Rest-  
388 activity rhythms in emerging adults: implications for cardiometabolic health. *Chronobiol Int.*  
389 2021;**38**:543-556.

- 390 16. Griggs S, Strohl KP, Grey M, Barbato E, Margevicius S, Hickman RL, Jr. Circadian  
391 characteristics of the rest-activity rhythm, executive function, and glucose fluctuations in young  
392 adults with type 1 diabetes. *Chronobiol Int.* 2021;**38**:1477-1487.
- 393 17. Rogers TS, Harrison S, Swanson C, Cauley JA, Barrett-Connor E, Orwoll E, *et al.* Rest-  
394 activity circadian rhythms and bone mineral density in elderly men. *Bone Rep.* 2017;**7**:156-163.
- 395 18. Xu Y, Su S, McCall WV, Isales C, Snieder H, Wang X. Rest-activity circadian rhythm  
396 and impaired glucose tolerance in adults: an analysis of NHANES 2011-2014. *BMJ Open*  
397 *Diabetes Res Care.* 2022;**10**.
- 398 19. Zuurbier LA, Luik AI, Hofman A, Franco OH, Van Someren EJ, Tiemeier H.  
399 Fragmentation and stability of circadian activity rhythms predict mortality: the Rotterdam study.  
400 *Am J Epidemiol.* 2015;**181**:54-63.
- 401 20. Graves JL, Qiao YS, Moored KD, Boudreau RM, Venditti EM, Kraffy RT, *et al.* Profiles  
402 of Accelerometry-Derived Physical Activity Are Related to Perceived Physical Fatigability in  
403 Older Adults. *Sensors (Basel).* 2021;**21**.
- 404 21. Qian J, Walkup MP, Chen SH, Brubaker PH, Bond DS, Richey PA, *et al.* Association of  
405 Objectively Measured Timing of Physical Activity Bouts With Cardiovascular Health in Type 2  
406 Diabetes. *Diabetes Care.* 2021;**44**:1046-1054.
- 407 22. van der Velde J, Boone SC, Winters-van Eekelen E, Hesselink MKC, Schrauwen-  
408 Hinderling VB, Schrauwen P, *et al.* Timing of physical activity in relation to liver fat content and  
409 insulin resistance. *Diabetologia.* 2023;**66**:461-471.
- 410 23. Chomistek AK, Shiroma EJ, Lee IM. The Relationship Between Time of Day of Physical  
411 Activity and Obesity in Older Women. *J Phys Act Health.* 2016;**13**:416-418.
- 412 24. Albalak G, Stijntjes M, van Bodegom D, Jukema JW, Atsma DE, van Heemst D, *et al.*  
413 Setting your clock: associations between timing of objective physical activity and cardiovascular  
414 disease risk in the general population. *Eur J Prev Cardiol.* 2022.
- 415 25. Feng H, Yang L, Liang YY, Ai S, Liu Y, Liu Y, *et al.* Associations of timing of physical  
416 activity with all-cause and cause-specific mortality in a prospective cohort study. *Nat Commun.*  
417 2023;**14**:930.
- 418 26. Cummings SR, Newman AB, Coen PM, Hepple RT, Collins R, Kennedy K, *et al.* The  
419 Study of Muscle, Mobility and Aging (SOMMA). A Unique Cohort Study about the Cellular  
420 Biology of Aging and Age-related Loss of Mobility. *J Gerontol A Biol Sci Med Sci.* 2023.
- 421 27. Espeland MA, Crimmins EM, Grossardt BR, Crandall JP, Gelfond JA, Harris TB, *et al.*  
422 Clinical Trials Targeting Aging and Age-Related Multimorbidity. *J Gerontol A Biol Sci Med*  
423 *Sci.* 2017;**72**:355-361.
- 424 28. Arguello D, Andersen K, Morton A, Freedson PS, Intille SS, John D. Validity of  
425 proximity sensor-based wear-time detection using the ActiGraph GT9X. *J Sports Sci.*  
426 2018;**36**:1502-1507.
- 427 29. Troiano RP, Berrigan D, Dodd KW, Mâsse LC, Tilert T, McDowell M. Physical activity  
428 in the United States measured by accelerometer. *Med Sci Sports Exerc.* 2008;**40**:181-188.
- 429 30. Cole RJ, Kripke DF, Gruen W, Mullaney DJ, Gillin JC. Automatic sleep/wake  
430 identification from wrist activity. *Sleep.* 1992;**15**:461-469.
- 431 31. Marler MR, Gehrman P, Martin JL, Ancoli-Israel S. The sigmoidally transformed cosine  
432 curve: a mathematical model for circadian rhythms with symmetric non-sinusoidal shapes. *Stat*  
433 *Med.* 2006;**25**:3893-3904.

- 434 32. Witting W, Kwa IH, Eikelenboom P, Mirmiran M, Swaab DF. Alterations in the  
435 circadian rest-activity rhythm in aging and Alzheimer's disease. *Biol Psychiatry*. 1990;**27**:563-  
436 572.
- 437 33. Van Someren EJ, Swaab DF, Colenda CC, Cohen W, McCall WV, Rosenquist PB.  
438 Bright light therapy: improved sensitivity to its effects on rest-activity rhythms in Alzheimer  
439 patients by application of nonparametric methods. *Chronobiol Int*. 1999;**16**:505-518.
- 440 34. Zeitzer JM, David R, Friedman L, Mulin E, Garcia R, Wang J, *et al*. Phenotyping apathy  
441 in individuals with Alzheimer disease using functional principal component analysis. *Am J*  
442 *Geriatr Psychiatry*. 2013;**21**:391-397.
- 443 35. Ding J, Symanzik J, Sharif A, Wang J, Duntley S, Shannon WD. Powerful actigraphy  
444 data through functional representation. *CHANCE*. 2011;**24**:30.
- 445 36. Li J, Somers VK, Lopez-Jimenez F, Di J, Covassin N. Demographic characteristics  
446 associated with circadian rest-activity rhythm patterns: a cross-sectional study. *Int J Behav Nutr*  
447 *Phys Act*. 2021;**18**:107.
- 448 37. Anderson ST, Meng H, Brooks TG, Tang SY, Lordan R, Sengupta A, *et al*. Sexual  
449 dimorphism in the response to chronic circadian misalignment on a high-fat diet. *Sci Transl Med*.  
450 2023;**15**:eabo2022.
- 451 38. Xiao Q, Matthews CE, Playdon M, Bauer C. The association between rest-activity  
452 rhythms and glycemic markers: the US National Health and Nutrition Examination Survey,  
453 2011-2014. *Sleep*. 2022;**45**.
- 454 39. Seifarth JE, McGowan CL, Milne KJ. Sex and life expectancy. *Gend Med*. 2012;**9**:390-  
455 401.  
456
- 457
- 458

459 **Table 1:** Associations of descriptive variables with rest-activity rhythm parameters. Site  
 460 adjusted means (95% CI).

| Descriptive                                               | N (%) In Category | Amplitude (counts/min)    | Parametric               |                               |                        | Nonparametric                    |                                    |
|-----------------------------------------------------------|-------------------|---------------------------|--------------------------|-------------------------------|------------------------|----------------------------------|------------------------------------|
|                                                           |                   |                           | Mesor (counts/min)       | Acrophase (portions of hours) | Pseudo-F value         | Interdaily Stability (range 0-1) | Intradaily Variability (range 0-2) |
| <b>Unadjusted mean ± SD</b>                               |                   | 2183.5 ± 1143.4           | 1307 ± 618.0             | 14.31 ± 1.5                   | 670.1 ± 302.4          | 0.58 ± 0.12                      | 0.89 ± 0.22                        |
| <b>Age, years</b>                                         |                   |                           |                          |                               |                        |                                  |                                    |
| 70-74 (reference)                                         | 377 (46.0)        | 2328.7 (2214.3, 2443.2)   | 1377.6 (1315.5, 1439.7)  | 14.3 (14.1, 14.4)             | 674.1 (643.6, 704.6)   | 0.58 (0.56, 0.59)                | 0.88 (0.86, 0.90)                  |
| 75-79                                                     | 252 (31.7)        | 2170.8 (2030.9, 2310.8)   | 1289.7 (1213.8, 1365.6)  | 14.4 (14.2, 14.6)             | 692.3 (655.0, 729.6)   | 0.59 (0.57, 0.60)                | 0.87 (0.84, 0.89)                  |
| 80-84                                                     | 125 (15.2)        | 1993.4 (1794.5, 2192.2)** | 1218.7 (1110.8, 1326.5)* | 14.2 (13.9, 14.5)             | 624.4 (571.3, 677.4)   | 0.57 (0.55, 0.59)                | 0.96 (0.92, 1.00)***               |
| 85+                                                       | 66 (8.1)          | 1762.7 (1489.2, 2036.2)** | 1137.2 (988.8, 1285.5)** | 14.3 (14.0, 14.7)             | 649.5 (576.6, 722.5)   | 0.58 (0.55, .061)                | 0.94 (0.89, 1.00)*                 |
| <i>P</i> -trend                                           |                   | <0.001                    | <0.001                   | 0.96                          | 0.23                   | 0.83                             | 0.001                              |
| <b>Sex</b>                                                |                   |                           |                          |                               |                        |                                  |                                    |
| Men                                                       | 343 (41.8)        | 2119.6 (1998.5, 2240.6)   | 1286.6 (1221.2, 1352.1)  | 14.2 (14.0, 14.4)             | 605.0 (573.5, 636.5)   | 0.56 (0.55, 0.57)                | 0.92 (0.90, 0.95)                  |
| Women                                                     | 477 (58.2)        | 2229.5 (2126.9, 2332.1)   | 1321.7 (1266.1, 1377.2)  | 14.4 (14.3, 14.5)             | 717.0 (690.3, 743.7)   | 0.59 (0.58, 0.60)                | 0.87 (0.85, 0.89)                  |
| <i>P</i> -value                                           |                   | 0.17                      | 0.42                     | 0.07                          | <0.001                 | <0.001                           | <0.001                             |
| <b>Race</b>                                               |                   |                           |                          |                               |                        |                                  |                                    |
| White                                                     | 697 (85.0)        | 2213.0 (2128.2, 2297.9)   | 1313.6 (1267.7, 1359.5)  | 14.3 (14.2, 14.4)             | 678.4 (656.0, 700.9)   | 0.59 (0.58, 0.60)                | 0.90 (0.88, 0.92)                  |
| Non-White                                                 | 123 (15.0)        | 2016.3 (1814.3, 2218.2)   | 1269.6 (1160.3, 1379.0)  | 14.5 (14.2, 14.7)             | 623.3 (569.9, 676.6)   | 0.54 (0.52, 0.56)                | 0.85 (0.81, 0.89)                  |
| <i>P</i> -trend                                           |                   | 0.08                      | 0.47                     | 0.22                          | 0.06                   | <0.001                           | 0.03                               |
| <b>Education Level</b>                                    |                   |                           |                          |                               |                        |                                  |                                    |
| High school or less or other                              | 121 (14.9)        | 2235.1 (2030.2, 2440.1)   | 1366.6 (1255.9, 1477.3)  | 14.3 (14.0, 14.5)             | 700.6 (646.8, 754.5)   | 0.57 (0.55, 0.60)                | 0.86 (0.83, 0.90)*                 |
| Some college                                              | 188 (23.2)        | 2146.7 (1982.0, 2311.4)   | 1265.1 (1176.2, 1354.1)  | 14.5 (14.3, 14.7)             | 709.4 (666.1, 752.7)*  | 0.59 (0.57, 0.60)                | 0.85 (0.81, 0.88)***               |
| College Graduate                                          | 209 (25.7)        | 2164.0 (2007.9, 2320.2)   | 1320.6 (1236.3, 1405.0)  | 14.1 (13.9, 14.3)             | 645.0 (604.0, 686.1)   | 0.57 (0.55, 0.59)                | 0.92 (0.89, 0.95)                  |
| Post College Graduate (reference)                         | 294 (36.2)        | 2206.8 (2074.9, 2338.8)   | 1302.8 (1231.6, 1374.1)  | 14.3 (14.1, 14.5)             | 650.1 (615.4, 684.8)   | 0.58 (0.57, 0.60)                | 0.92 (0.89, 0.94)                  |
| <i>P</i> -trend                                           |                   | 0.97                      | 0.69                     | 0.54                          | 0.03                   | 0.77                             | <0.001                             |
| <b>How well money takes care of needs at end of month</b> |                   |                           |                          |                               |                        |                                  |                                    |
| Refused/Poorly                                            | 41 (5.0)          | 1891.4 (1540.8, 2241.9)   | 1165.1 (975.5, 1354.7)   | 14.8 (14.4, 15.3)*            | 590.8 (498.6, 683.1)*  | 0.54 (0.50, 0.58)**              | 0.93 (0.86, 1.00)                  |
| Fairly well                                               | 252 (30.9)        | 2138.1 (1996.4, 2279.8)   | 1307.4 (1230.7, 1384.0)  | 14.5 (14.3, 14.7)*            | 630.0 (592.7, 667.2)** | 0.55 (0.54, 0.57)***             | 0.88 (0.86, 0.91)                  |
| Very well (reference)                                     | 522 (64.1)        | 2231.6 (2133.3, 2329.9)   | 1320.0 (1266.9, 1373.2)  | 14.2 (14.1, 14.3)             | 696.1 (670.2, 721.9)   | 0.60 (0.58, 0.61)                | 0.90 (0.88, 0.91)                  |
| <i>P</i> -trend                                           |                   | 0.06                      | 0.25                     | 0.001                         | 0.001                  | <0.001                           | 0.97                               |
| <b>Work or volunteer schedule</b>                         |                   |                           |                          |                               |                        |                                  |                                    |
| No regular schedule                                       | 492 (60.6)        | 2101.0 (2008.8, 2211.1)   | 1279.0 (1224.2, 1333.8)  | 14.3 (14.2, 14.5)             | 665.5 (638.7, 692.3)   | 0.58 (0.57, 0.59)                | 0.90 (0.88, 0.92)                  |
| Regular schedule                                          | 320 (39.4)        | 2304.1 (2178.7, 2429.5)   | 1352.0 (1284.1, 1420.0)  | 14.3 (14.1, 14.5)             | 678.8 (645.6, 712.1)   | 0.58 (0.56, 0.59)                | 0.88 (0.86, 0.90)                  |
| <i>P</i> -trend                                           |                   | 0.02                      | 0.10                     | 0.69                          | 0.54                   | 0.47                             | 0.14                               |
| <b>Marital status</b>                                     |                   |                           |                          |                               |                        |                                  |                                    |

|                                             |            |                         |                         |                    |                         |                   |                   |
|---------------------------------------------|------------|-------------------------|-------------------------|--------------------|-------------------------|-------------------|-------------------|
| Married/in married-like relationship        | 418 (51.2) | 2306.0 (2196.6, 2415.4) | 1367.6 (1308.4, 1426.8) | 14.2 (14.0, 14.3)  | 694.9 (665.9, 723.9)    | 0.60 (0.58, 0.61) | 0.90 (0.88, 0.93) |
| Unmarried                                   | 398 (48.8) | 2052.8 (1940.7, 2164.9) | 1242.5 (1181.9, 1303.2) | 14.4 (14.3, 14.6)  | 642.3 (612.7, 672.0)    | 0.56 (0.55, 0.57) | 0.88 (0.86, 0.90) |
| <i>P</i> -trend                             |            | 0.002                   | 0.004                   | 0.01               | 0.01                    | <0.001            | 0.17              |
| <b>Self-reported health status</b>          |            |                         |                         |                    |                         |                   |                   |
| Good or fair                                | 313 (38.5) | 2054.8 (1928.0, 2181.6) | 1245.3 (1176.7, 1313.9) | 14.5 (14.3, 14.7)  | 650.0 (616.5, 683.6)    | 0.57 (0.56, 0.58) | 0.89 (0.87, 0.92) |
| Excellent or very good                      | 501 (61.6) | 2264.1 (2163.9, 2364.3) | 1345.5 (1291.3, 1399.7) | 14.19 (14.1, 14.3) | 682.0 (655.5, 708.5)    | 0.59 (0.57, 0.60) | 0.89 (0.88, 0.91) |
| <i>P</i> -trend                             |            | 0.01                    | 0.03                    | 0.003              | 0.14                    | 0.07              | 0.82              |
| <b>Number of multimorbidities (0-13)***</b> |            |                         |                         |                    |                         |                   |                   |
| None (reference)                            | 134 (16.7) | 2242.9 (2048.4, 2437.3) | 1343.2 (1238.4, 1448.1) | 14.2 (13.9, 14.4)  | 701.80 (650.63, 752.97) | 0.59 (0.57, 0.61) | 0.88 (0.84, 0.91) |
| 1                                           | 284 (35.3) | 2252.1 (2118.5, 2385.7) | 1336.7 (1264.7, 1408.8) | 14.2 (14.0, 14.4)  | 676.62 (641.46, 711.77) | 0.58 (0.56, 0.59) | 0.91 (0.88, 0.94) |
| 2                                           | 246 (30.6) | 2141.2 (1997.7, 2284.8) | 1283.9 (1206.6, 1361.3) | 14.5 (14.3, 14.7)* | 645.28 (607.51, 683.04) | 0.57 (0.56, 0.59) | 0.88 (0.86, 0.91) |
| 3+                                          | 140 (17.4) | 2083.9 (1893.5, 2274.4) | 1259.0 (1156.4, 1361.7) | 14.4 (14.1, 14.6)  | 675.86 (625.76, 725.97) | 0.59 (0.57, 0.61) | 0.89 (0.86, 0.93) |
| <i>P</i> -trend                             |            | 0.13                    | 0.15                    | 0.07               | 0.27                    | 0.81              | 0.98              |
| <b>Smoking status</b>                       |            |                         |                         |                    |                         |                   |                   |
| Never smoked                                | 457 (56.1) | 2184.8 (2079.5, 2290.2) | 1303.0 (1246.1, 1359.9) | 14.4 (14.2, 14.5)  | 663.65 (635.84, 691.45) | 0.57 (0.56, 0.58) | 0.90 (0.88, 0.92) |
| Current or past smoker                      | 358 (43.9) | 2184.6 (2065.5, 2303.6) | 1314.1 (1249.8, 1378.4) | 14.3 (14.1, 14.4)  | 677.54 (646.11, 708.97) | 0.59 (0.57, 0.60) | 0.89 (0.87, 0.91) |
| <i>P</i> -trend                             |            | 1.0                     | 0.80                    | 0.39               | 0.52                    | 0.15              | 0.64              |

461 All models are adjusted by clinic site (RAR parameter~clinic site + one descriptive characteristic  
462 in separate models).

463 For predictors with >2 categories, a *P*-trend was calculated, looking for a linear trend across the  
464 categories. Categories were also compared to the reference category.

465 The symbols represent the *P* -value for the comparison of the category to the reference category.

466 Symbols: \*= *P*-value<0.05; \*\*= *P*-value<0.01; \*\*\* *P*-value<0.001

467 **Figure Captions**

468 **Figure 1:**

469 **Title:** Representative examples of rest-activity rhythm profiles demonstrating differences  
470 in rhythmic amplitude and rhythmic strength in community-dwelling men and women 70  
471 and older: the SOMMA Cohort.

472 **Caption:** Comparison of representative rest-activity rhythm plots of individual  
473 participants from the highest 10<sup>th</sup> percentile of amplitude (Panel A) versus lowest 10<sup>th</sup>  
474 percentile of amplitude (Panel B). Amplitude, minimum, and mesor are labeled with red  
475 dashed line. Acrophase (time of peak activity) is shown with a gray bar. Comparison of  
476 representative rest-activity rhythms of individual participants from the lowest decile  
477 values for pseudo F-statistic (Panel C) versus the highest decile values for pseudo F-  
478 statistic (Panel D) to graphically illustrate stronger rhythmic strength with clear sleep-  
479 wake patterns versus weaker rhythmic strength with less distinct sleep-wake patterns.  
480 Mesor (yellow line), amplitude (red line), fitted curve (blue line) and acrophase (gray  
481 bar) are labeled.

482

483 **Figure 2:**

484 **Title:** Four components of functional principal component analysis (fPCA).

485 **Caption:** The average pattern of activity for all participants (black line); average pattern  
486 of activity in participants with the eigenvalue of positive fPCA scores (red line); average  
487 pattern of activity in participants with the eigenvalue of negative fPCA scores (blue line).  
488 fPCA1 represents high and low overall activity explaining 55.8% of variance (Panel A).  
489 fPCA2 represents later activity timing (positive eigenvalues) and earlier (negative

490 eigenvalues) activity timing (Panel B) explaining 20.5% of variance. fPCA3 represents  
491 longer, biphasic (low eigenvalues) and shorter, more monophasic (high eigenvalues),  
492 activity patterns explaining 8.6% of variance (Panel C). fPCA4 represents morning (high  
493 eigenvalues) and evening (low eigenvalues) peaks in activity explaining 5.6% of variance  
494 (Panel D).

495

496 **Figure 3:**

497 **Title: Older community-dwelling** women have higher rhythmic amplitude and rhythmic  
498 strength compared to male counterparts.

499 **Caption:** Kernel density plots of multiple adjusted predicted values shown separately by  
500 men (red) and women (blue) for parametric and non-parametric parameters, including  
501 rhythmic amplitude (Panel A), mesor (Panel B), acrophase (Panel C), Psuedo F-statistic  
502 (Panel D), interdaily stability (Panel E), intradaily variability (Panel F), L5 (Panel G) and  
503 M10 (Panel H). Dashed lines represent adjusted means. Model adjusted for clinic site  
504 plus all characteristics examined. *P*-values represents comparison between sexes.

505

506 **Figure 4:**

507 **Title:** Temporal distribution of average activity across 24h by category of acrophase in  
508 community-dwelling older adults

509 **Caption:** Graphical representation of average activity stratified by category of acrophase  
510 (lowest decile: <12:43 PM, red line, middle decile (45-55 percentile): 2:10-2:28 PM,  
511 black line; upper decile: >3:55 PM, blue line) over all participants (Panel A), and also  
512 separated by men (Panel B) and women (Panel C).



513 **Figure 1**

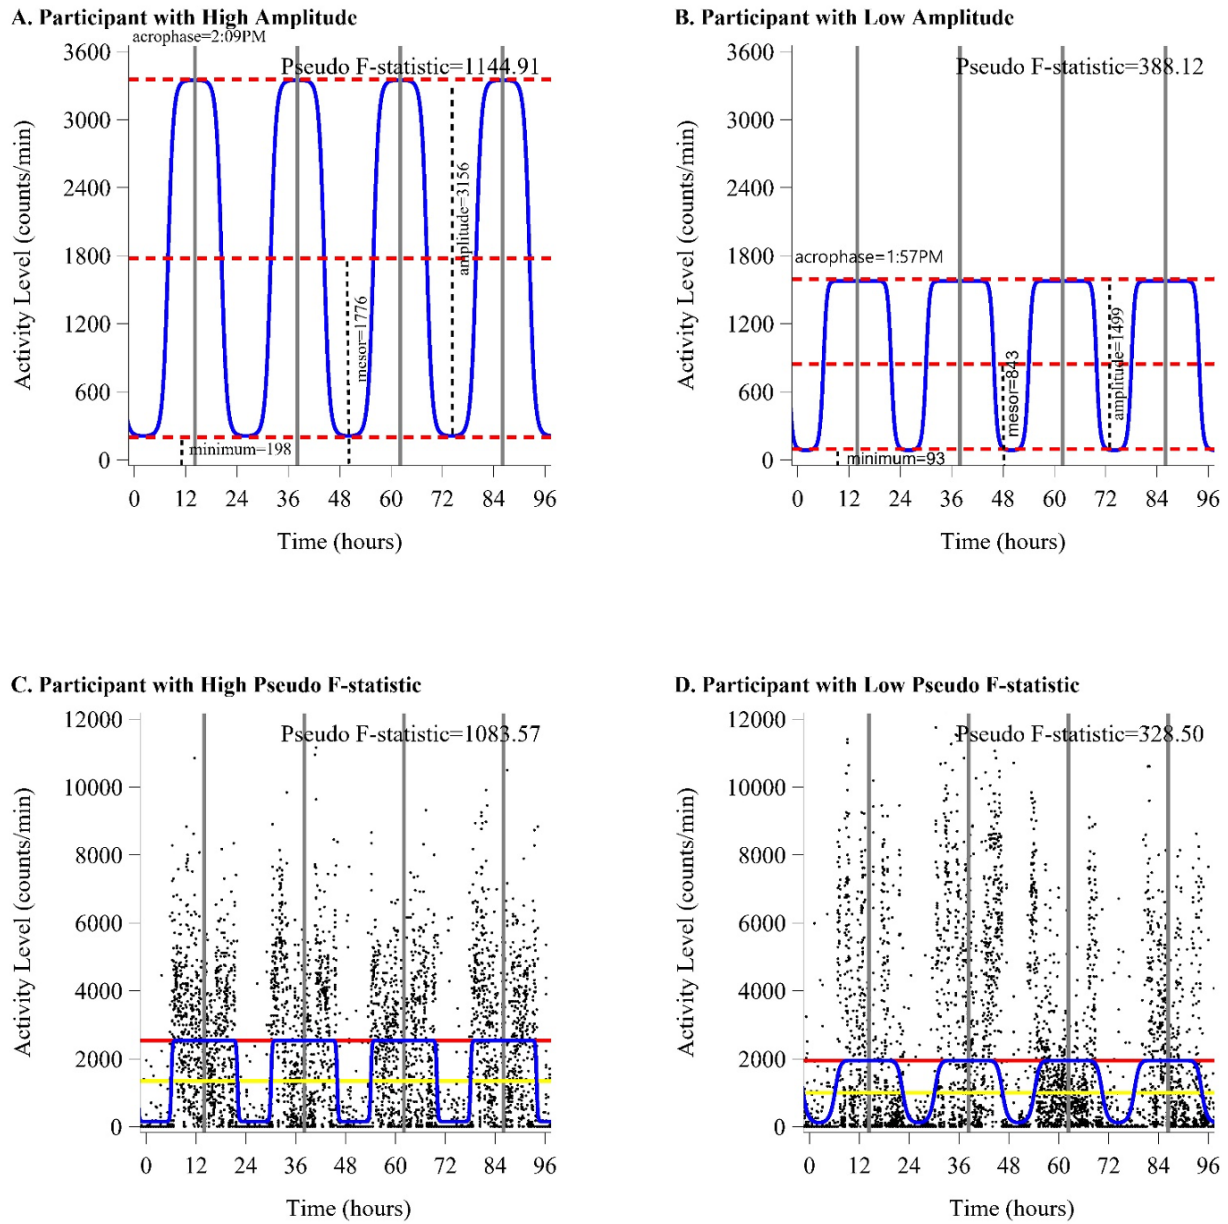

514

515

516 **Figure 2**

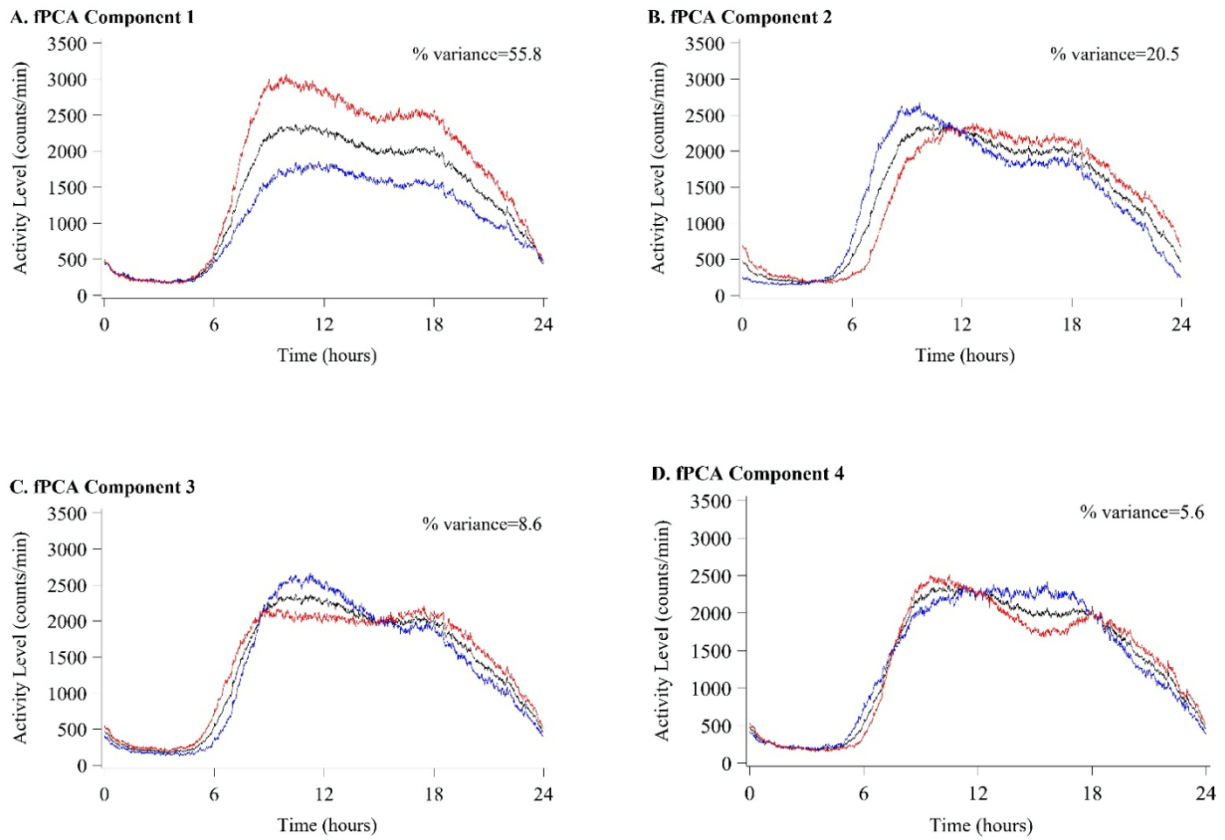

517

518

519 **Figure 3**

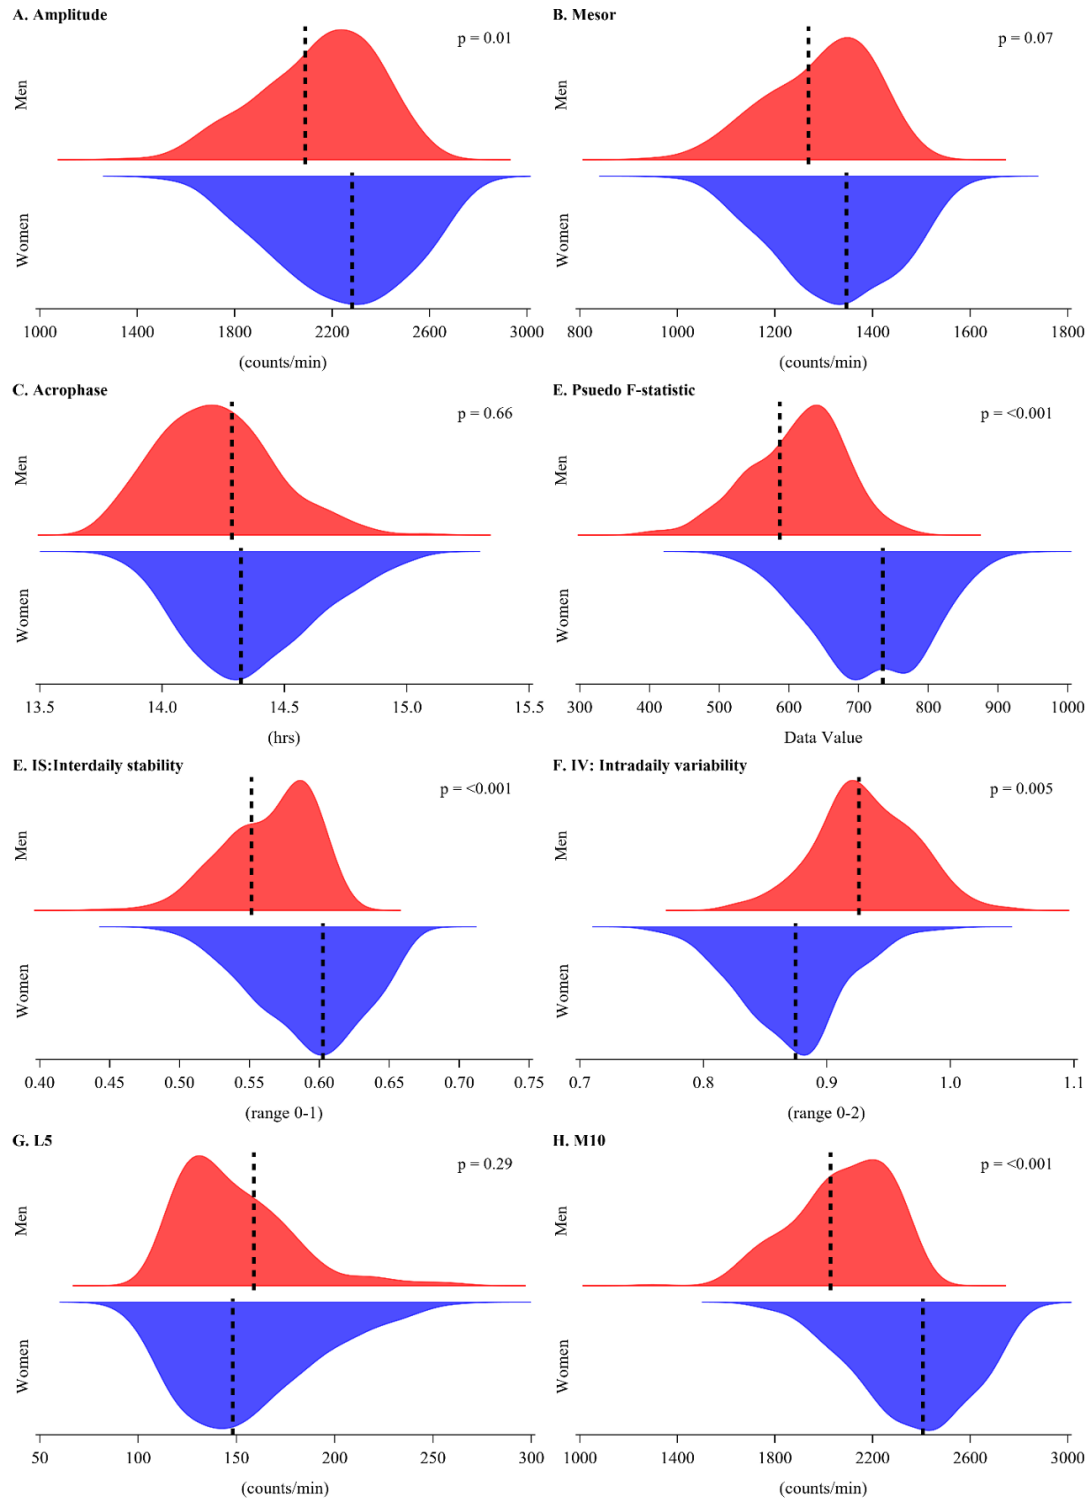

520

521

522 **Figure 4**

**A. All participants**

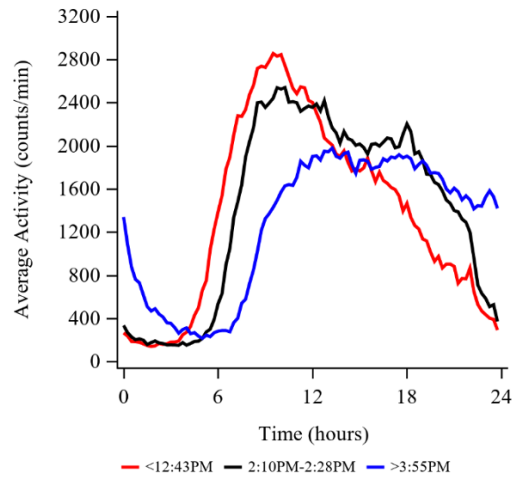

**B. Men**

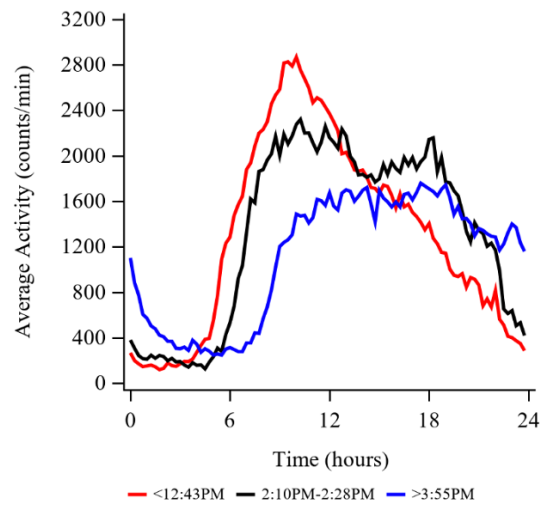

**C. Women**

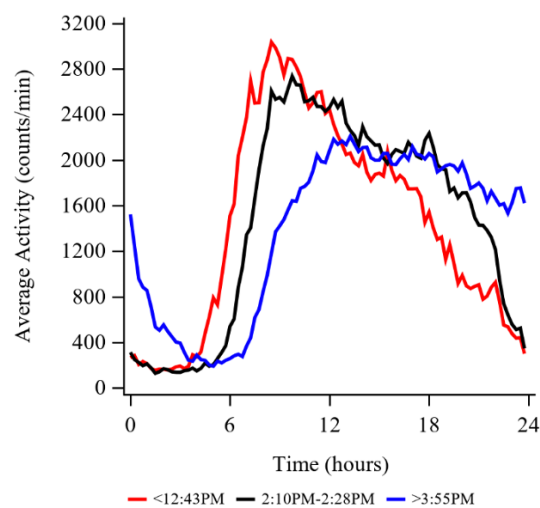

523

524

## Supplemental Materials

525 **Supplemental Table 1A:** Associations of descriptive variables with rest-activity rhythm parameters.  
 526 Site adjusted means (95% CI).

| Descriptive                                               | N (%) In Category | L5: counts/min             | M10: counts/min               | Relative amplitude ((M10-L5)/(M10+L5)) |
|-----------------------------------------------------------|-------------------|----------------------------|-------------------------------|----------------------------------------|
| <b>Unadjusted mean ± SD</b>                               |                   | 152.94 ± 114.64            | 2236.69 ± 664.46              | 0.87 ± 0.09                            |
| <b>Age (yrs)</b>                                          |                   |                            |                               |                                        |
| 70-74 (reference)                                         | 377 (46)          | 156.57 (145.00, 168.14)    | 2355.46 (2289.88, 2421.04)    | 0.87 (0.86, 0.88)                      |
| 75-79                                                     | 252 (31)          | 147.60 (133.45, 161.75)    | 2253.12 (2172.93, 2333.31)    | 0.87 (0.86, 0.88)                      |
| 80-84                                                     | 125 (15)          | 142.07 (121.96, 162.17)    | 1979.76 (1865.82, 2093.71)*** | 0.86 (0.85, 0.88)                      |
| 85+                                                       | 66 (8)            | 173.13 (145.47, 200.78)    | 1982.09 (1825.37, 2138.80)*** | 0.85 (0.82, 0.87)                      |
| <i>P</i> -trend                                           |                   | 0.99                       | <0.001                        | 0.11                                   |
| <b>Sex</b>                                                |                   |                            |                               |                                        |
| Males                                                     | 343 (42)          | 149.87 (137.73, 162.01)    | 2061.65 (1993.03, 2130.28)    | 0.86 (0.85, 0.87)                      |
| Females                                                   | 477 (58)          | 155.14 (144.85, 165.44)    | 2362.55 (2304.36, 2420.74)    | 0.87 (0.86, 0.88)                      |
| <i>P</i> -value                                           |                   | 0.52                       | <0.001                        | 0.03                                   |
| <b>Race</b>                                               |                   |                            |                               |                                        |
| White                                                     | 697 (85)          | 143.84 (135.48, 152.21)    | 2251.35 (2202.04, 2300.67)    | 0.87 (0.87, 0.88)                      |
| Non-White                                                 | 123 (15)          | 204.47 (184.56, 224.38)    | 2153.59 (2036.19, 2270.99)    | 0.82 (0.80, 0.84)                      |
| <i>P</i> -trend                                           |                   | <0.001                     | 0.13                          | <0.001                                 |
| <b>Education Level</b>                                    |                   |                            |                               |                                        |
| High school or less or other                              | 121 (14.90)       | 178.12 (157.76, 198.48)**  | 2257.91 (2139.17, 2376.65)    | 0.85 (0.83, 0.86)**                    |
| Some college                                              | 188 (23.15)       | 158.58 (142.22, 174.94)    | 2292.44 (2197.03, 2387.85)    | 0.87 (0.85, 0.88)                      |
| College Graduate                                          | 209 (25.74)       | 149.98 (134.47, 165.49)    | 2186.80 (2096.32, 2277.28)    | 0.86 (0.85, 0.87)                      |
| Post College Graduate (reference)                         | 294 (36.21)       | 140.24 (127.13, 153.34)    | 2230.53 (2154.08, 2306.99)    | 0.88 (0.87, 0.89)                      |
| <i>P</i> -trend                                           |                   | 0.002                      | 0.40                          | 0.01                                   |
| <b>How well money takes care of needs at end of month</b> |                   |                            |                               |                                        |
| Refused/Poorly                                            | 41 (5.03)         | 184.16 (149.50, 218.82)*   | 1932.95 (1731.53, 2134.37)*** | 0.83 (0.80, 0.85)***                   |
| Fairly well                                               | 252 (30.92)       | 179.31 (165.30, 193.32)*** | 2150.34 (2068.94, 2231.73)**  | 0.84 (0.83, 0.85)***                   |

|                                              |             |                         |                            |                   |
|----------------------------------------------|-------------|-------------------------|----------------------------|-------------------|
| Very well (reference)                        | 522 (64.05) | 137.63 (127.91, 147.35) | 2303.67 (2247.19, 2360.14) | 0.88 (0.87, 0.89) |
| <i>P</i> -trend                              |             | <0.001                  | <0.001                     | <0.001            |
| <b>Work or Volunteer Schedule</b>            |             |                         |                            |                   |
| No regular schedule                          | 492 (60.59) | 150.51 (140.39, 160.63) | 2193.86 (2135.29, 2252.42) | 0.87 (0.86, 0.87) |
| Regular schedule                             | 320 (39.41) | 155.88 (143.32, 168.43) | 2303.04 (2230.40, 2375.68) | 0.87 (0.86, 0.88) |
| <i>P</i> -trend                              |             | 0.51                    | 0.02                       | 0.57              |
| <b>Martial Status</b>                        |             |                         |                            |                   |
| Married/in married-like relationship         | 418 (51.23) | 135.66 (124.76, 146.57) | 2298.24 (2234.71, 2361.77) | 0.88 (0.87, 0.89) |
| Unmarried                                    | 398 (48.77) | 171.05 (159.87, 182.22) | 2167.47 (2102.36, 2232.58) | 0.85 (0.84, 0.86) |
| <i>P</i> -trend                              |             | <0.001                  | 0.005                      | <0.001            |
| <b>Self-reported Health Status</b>           |             |                         |                            |                   |
| Good or fair                                 | 313 (38.45) | 169.42 (156.75, 182.09) | 2130.20 (2056.88, 2203.52) | 0.85 (0.84, 0.86) |
| Excellent or very good                       | 501 (61.55) | 142.88 (132.87, 152.90) | 2300.63 (2242.68, 2358.58) | 0.88 (0.87, 0.89) |
| <i>P</i> -trend                              |             | 0.001                   | 0.0004                     | <0.0001           |
| <b>Number of multi-morbidities (0-13)***</b> |             |                         |                            |                   |
| None (reference)                             | 134 (16.67) | 139.70 (120.31, 159.08) | 2264.72 (2152.53, 2376.90) | 0.88 (0.86, 0.89) |
| 1                                            | 284 (35.32) | 157.74 (144.42, 171.05) | 2271.50 (2194.43, 2348.57) | 0.87 (0.85, 0.88) |
| 2                                            | 246 (30.60) | 155.04 (140.73, 169.35) | 2217.21 (2134.41, 2300.01) | 0.86 (0.85, 0.87) |
| 3+                                           | 140 (17.41) | 146.95 (127.97, 165.93) | 2181.69 (2071.84, 2291.54) | 0.87 (0.85, 0.89) |
| <i>P</i> -trend                              |             | 0.76                    | 0.18                       | 0.47              |
| <b>Smoking Status</b>                        |             |                         |                            |                   |
| Never smoked                                 | 457 (56.07) | 151.87 (141.32, 162.42) | 2241.99 (2180.86, 2303.12) | 0.87 (0.86, 0.88) |
| Current or past smoker                       | 358 (43.93) | 154.08 (142.16, 166.01) | 2230.16 (2161.07, 2299.24) | 0.86 (0.85, 0.87) |
| <i>P</i> -trend                              |             | 0.79                    | 0.80                       | 0.60              |

All models are adjusted by clinic site (RAR parameter~clinic site + one descriptive characteristic in separate models)

L5: Avg activity of the 5 consecutive hours with least activity

M10: Avg activity of the 10 consecutive hours with most activity

For predictors with >2 categories, a p-trend was calculated, looking for a linear trend across the categories.

Categories were also compared to the reference category.

The symbols represent the p-value for the comparison of this category to the reference category

Symbols: \*= p-value<0.05; \*\*= p-value<0.01; \*\*\*= p-value<0.001

\*\*\* Mutimorbidity index includes arthritis, cancer (excluding nonmelanoma skin cancer), atrial fibrillation, chronic kidney disease, chronic obstructive pulmonary disease, heart disease, congestive heart failure, dementia, depression, diabetes mellitus, osteoporosis, stroke and aortic stenosis

527 **Supplemental Table 1B:** Associations of descriptive variables with rest-activity rhythm parameters.  
 528 Site adjusted means (95% CI).

| Descriptive                       | N (%) In Category | Shape-naïve functional principal components |                              |                             |                            |
|-----------------------------------|-------------------|---------------------------------------------|------------------------------|-----------------------------|----------------------------|
|                                   |                   | fPCA Component 1                            | fPCA Component 2             | fPCA Component 3            | fPCA Component 4           |
| <b>Unadjusted mean ± SD</b>       |                   | -28.82 ± 18257.79                           | -2.63 ± 11074.01             | -1.96 ± 7188.92             | 3.80 ± 5807.47             |
| 70-74 (reference)                 | 377 (46)          | 2967.10 (1156.62, 4777.58)                  | -180.27 (-1290.79, 930.25)   | -36.76 (-762.59, 689.08)    | -44.31 (-627.49, 538.87)   |
| 75-79                             | 252 (31)          | 297.73 (-1916.13, 2511.58)                  | 1194.54 (-163.40, 2552.48)   | -212.86 (-1100.41, 674.70)  | -537.53 (-1250.65, 175.58) |
| 80-84                             | 125 (15)          | -6246.84 (-9392.45, -3101.22)***            | -1127.41 (-3056.88, 802.05)  | -134.76 (-1395.87, 1126.35) | 893.13 (-120.12, 1906.38)  |
| 85+                               | 66 (8)            | -6612.19 (-10938.66, -2285.72)***           | -1428.66 (-4082.44, 1225.11) | 1253.59 (-480.93, 2988.11)  | 661.17 (-732.45, 2054.79)  |
| <i>P</i> -trend                   |                   | <0.001                                      | 0.38                         | 0.41                        | 0.17                       |
| Males                             | 343 (42)          | -4860.33 (-6745.71, -2974.96)               | -1463.75 (-2622.63, -304.86) | 243.32 (-517.16, 1003.80)   | -198.75 (-811.17, 413.66)  |
| Females                           | 477 (58)          | 3445.40 (1846.69, 5044.12)                  | 1048.03 (65.35, 2030.71)     | -178.33 (-823.18, 466.52)   | 149.45 (-369.85, 668.75)   |
| <i>P</i> -value                   |                   | <0.001                                      | 0.001                        | 0.41                        | 0.40                       |
| White                             | 697 (85)          | 382.84 (-972.27, 1737.95)                   | -157.83 (-975.43, 659.77)    | -224.10 (-756.29, 308.09)   | -94.44 (-523.84, 334.95)   |
| Non-White                         | 123 (15)          | -2361.61 (-5587.47, 864.25)                 | 876.85 (-1069.46, 2823.16)   | 1256.85 (-10.03, 2523.73)   | 560.50 (-461.68, 1582.68)  |
| <i>P</i> -trend                   |                   | 0.12                                        | 0.34                         | 0.04                        | 0.25                       |
| High school or less or other      | 121 (14.90)       | 53.93 (-3207.99, 3315.84)                   | 695.08 (-1259.01, 2649.17)   | -331.99 (-1617.94, 953.97)  | -285.46 (-1319.00, 748.07) |
| Some college                      | 188 (23.15)       | 1433.63 (-1187.43, 4054.69)                 | 1693.31 (123.14, 3263.49)*   | 63.47 (-969.84, 1096.77)    | 149.78 (-680.70, 980.26)   |
| College Graduate                  | 209 (25.74)       | -1423.75 (-3909.43, 1061.93)                | -1431.22 (-2920.30, 57.85)   | -249.23 (-1229.16, 730.71)  | -112.75 (-900.34, 674.84)  |
| Post College Graduate (reference) | 294 (36.21)       | 84.62 (-2015.63, 2184.87)                   | -557.33 (-1815.51, 700.85)   | 220.04 (-607.95, 1048.03)   | 157.85 (-507.61, 823.32)   |
| <i>P</i> -trend                   |                   | 0.65                                        | 0.05                         | 0.56                        | 0.61                       |
| Refused/Poorly                    | 41 (5.03)         | -8497.41 (-14019.83, -2975.00)***           | 2731.20 (-615.68, 6078.08)*  | 823.99 (-1380.51, 3028.48)  | 10.81 (-1764.47, 1786.09)  |

|                                            |                |                                         |                                  |                                 |                                |
|--------------------------------------------|----------------|-----------------------------------------|----------------------------------|---------------------------------|--------------------------------|
| Fairly well                                | 252<br>(30.92) | -2931.52 (-<br>5163.13, -<br>699.92)*** | 1772.38 (419.91,<br>3124.85)***  | 204.84 (-686.00,<br>1095.67)    | -8.03 (-725.42,<br>709.36)     |
| Very well<br>(reference)                   | 522<br>(64.05) | 2061.37 (512.92,<br>3609.82)            | -1127.58 (-<br>2066.02, -189.14) | -193.93 (-812.05,<br>424.20)    | -1.84 (-499.62,<br>495.93)     |
| <i>P</i> -trend                            |                | <0.001                                  | <0.001                           | 0.30                            | 1.00                           |
| No regular<br>schedule                     | 492<br>(60.59) | -1316.60 (-<br>2925.89, 292.69)         | 12.90 (-961.87,<br>987.68)       | -93.01 (-728.48,<br>542.46)     | 142.96 (-366.90,<br>652.82)    |
| Regular<br>schedule                        | 320<br>(39.41) | 1916.95 (-78.87,<br>3912.78)            | -38.55 (-1247.45,<br>1170.36)    | 82.26 (-705.85,<br>870.36)      | -322.83 (-955.15,<br>309.50)   |
| <i>P</i> -trend                            |                | 0.01                                    | 0.95                             | 0.73                            | 0.26                           |
| Married/in<br>married-like<br>relationship | 418<br>(51.23) | 1548.37 (-198.04,<br>3294.78)           | -504.67 (-1562.34,<br>553.00)    | -555.48 (-<br>1244.04, 133.09)  | -196.08 (-751.87,<br>359.72)   |
| Unmarried                                  | 398<br>(48.77) | -1837.99 (-<br>3627.83, -48.15)         | 482.41 (-601.56,<br>1566.38)     | 545.06 (-160.63,<br>1250.75)    | 207.13 (-362.49,<br>776.74)    |
| <i>P</i> -trend                            |                | 0.008                                   | 0.20                             | 0.03                            | 0.32                           |
| Good or fair                               | 313<br>(38.45) | -3105.50 (-<br>5118.47, -<br>1092.53)   | 1530.18 (316.39,<br>2743.97)     | -245.77 (-<br>1043.10, 551.55)  | 255.16 (-386.68,<br>897.00)    |
| Excellent or<br>very good                  | 501<br>(61.55) | 1787.48 (196.55,<br>3378.41)            | -938.79 (-1898.10,<br>20.52)     | 113.69 (-516.47,<br>743.84)     | -170.98 (-678.26,<br>336.29)   |
| <i>P</i> -trend                            |                | 0.0002                                  | 0.002                            | 0.49                            | 0.31                           |
| None<br>(reference)                        | 134<br>(16.67) | 301.41 (-2775.21,<br>3378.03)           | -813.34 (-2667.09,<br>1040.40)   | -1249.70 (-<br>2436.13, -63.27) | -651.40 (-<br>1631.56, 328.76) |
| 1                                          | 284<br>(35.32) | 1027.18 (-<br>1086.42, 3140.79)         | -784.72 (-2058.23,<br>488.78)    | -61.95 (-877.02,<br>753.11)     | 2.00 (-671.36,<br>675.36)      |
| 2                                          | 246<br>(30.60) | -483.79 (-2754.52,<br>1786.94)          | 1108.10 (-260.08,<br>2476.27)    | 183.54 (-692.11,<br>1059.20)    | 467.19 (-256.23,<br>1190.60)   |
| 3+                                         | 140<br>(17.41) | -1575.29 (-<br>4587.80, 1437.21)        | 329.39 (-1485.72,<br>2144.51)    | 102.46 (-1059.24,<br>1264.17)   | -282.43 (-<br>1242.16, 677.30) |
| <i>P</i> -trend                            |                | 0.23                                    | 0.11                             | 0.11                            | 0.42                           |
| Never<br>smoked                            | 457<br>(56.07) | 138.44 (-1541.40,<br>1818.28)           | 444.87 (-565.08,<br>1454.82)     | 159.38 (-501.03,<br>819.79)     | 87.15 (-444.82,<br>619.12)     |
| Current or<br>past smoker                  | 358<br>(43.93) | -262.78 (-2161.22,<br>1635.67)          | -620.00 (-1761.37,<br>521.38)    | -261.09 (-<br>1007.45, 485.26)  | -99.04 (-700.24,<br>502.17)    |
| <i>P</i> -trend                            |                | 0.76                                    | 0.17                             | 0.41                            | 0.65                           |

All models are adjusted by clinic site (RAR parameter~clinic site + one descriptive characteristic in separate models)

L5: Avg activity of the 5 consecutive hours with least activity

M10: Avg activity of the 10 consecutive hours with most activity

For predictors with >2 categories, a p-trend was calculated, looking for a linear trend across the categories.

Categories were also compared to the reference category.

The symbols represent the p-value for the comparison of this category to the reference category

Symbols: \*= p-value<0.05; \*\*= p-value<0.01; \*\*\*= p-value<0.001



\*\*\* Multimorbidity index includes arthritis, cancer (excluding nonmelanoma skin cancer), atrial fibrillation, chronic kidney disease, chronic obstructive pulmonary disease, heart disease, congestive heart failure, dementia, depression, diabetes mellitus, osteoporosis, stroke and aortic stenosis

529

530 **Supplemental Table 2A:** Associations of descriptive variables with parametric rest-activity rhythm  
 531 parameters. Multivariable adjusted means (95% CI).

| Descriptive                                               | Parametric                   |                             |                              |                            |
|-----------------------------------------------------------|------------------------------|-----------------------------|------------------------------|----------------------------|
|                                                           | Amplitude, counts/min        | Mesor, counts/min           | Acrophase, portions of hours | Pseudo f-value             |
| <b>Age (yrs)</b>                                          |                              |                             |                              |                            |
| 70-74 (reference)                                         | 2311.28 (2191.99, 2430.56)   | 1368.73 (1303.89, 1433.58)  | 14.30 (14.15, 14.46)         | 664.66 (634.14, 695.18)    |
| 75-79                                                     | 2183.72 (2040.11, 2327.33)   | 1294.29 (1216.22, 1372.36)  | 14.39 (14.21, 14.58)         | 696.09 (659.35, 732.83)    |
| 80-84                                                     | 2018.41 (1813.55, 2223.27)*  | 1228.77 (1117.40, 1340.14)* | 14.13 (13.87, 14.40)         | 625.00 (572.59, 677.42)    |
| 85+                                                       | 1860.60 (1575.95, 2145.26)** | 1185.86 (1031.11, 1340.60)* | 14.27 (13.90, 14.64)         | 689.46 (616.63, 762.29)    |
| <i>P</i> -trend                                           | <0.001                       | 0.007                       | 0.54                         | 0.88                       |
| <b>Sex</b>                                                |                              |                             |                              |                            |
| Males                                                     | 2063.09 (1934.14, 2192.03)   | 1257.77 (1187.67, 1327.87)  | 14.27 (14.10, 14.44)         | 580.85 (547.75, 613.94)    |
| Females                                                   | 2282.50 (2174.69, 2390.31)   | 1346.85 (1288.24, 1405.45)  | 14.32 (14.18, 14.46)         | 734.72 (707.04, 762.39)    |
| <i>P</i> -value                                           | 0.01                         | 0.07                        | 0.66                         | <0.001                     |
| <b>Race</b>                                               |                              |                             |                              |                            |
| White                                                     | 2215.51 (2129.55, 2301.46)   | 1314.33 (1267.59, 1361.06)  | 14.30 (14.18, 14.41)         | 675.52 (653.46, 697.59)    |
| Non-White                                                 | 2042.52 (1827.28, 2257.77)   | 1281.26 (1164.25, 1398.28)  | 14.33 (14.05, 14.61)         | 639.49 (584.23, 694.74)    |
| <i>P</i> -trend                                           | 0.15                         | 0.61                        | 0.81                         | 0.24                       |
| <b>Education Level</b>                                    |                              |                             |                              |                            |
| High school or less or other                              | 2319.81 (2108.88, 2530.75)   | 1397.11 (1282.52, 1511.70)  | 14.25 (13.97, 14.52)         | 721.73 (667.56, 775.90)**  |
| Some college                                              | 2158.88 (1989.53, 2328.22)   | 1270.33 (1178.33, 1362.32)  | 14.43 (14.21, 14.65)         | 705.53 (662.04, 749.02)*   |
| College Graduate                                          | 2158.26 (2000.35, 2316.18)   | 1315.31 (1229.53, 1401.10)  | 14.14 (13.94, 14.35)         | 653.38 (612.83, 693.93)    |
| Post College Graduate (reference)                         | 2181.92 (2047.42, 2316.41)   | 1294.98 (1221.91, 1368.04)  | 14.36 (14.18, 14.53)         | 639.32 (604.78, 673.85)    |
| <i>P</i> -trend                                           | 0.45                         | 0.35                        | 0.86                         | 0.004                      |
| <b>How well money takes care of needs at end of month</b> |                              |                             |                              |                            |
| Refused/Poorly                                            | 2074.24 (1689.09, 2459.40)   | 1262.09 (1052.73, 1471.46)  | 14.65 (14.15, 15.14)         | 574.27 (475.43, 673.12)*   |
| Fairly well                                               | 2166.52 (2018.09, 2314.94)   | 1315.85 (1235.17, 1396.53)  | 14.44 (14.25, 14.63)         | 619.47 (581.38, 657.57)*** |
| Very well (reference)                                     | 2210.23 (2108.98, 2311.47)   | 1309.87 (1254.83, 1364.90)  | 14.21 (14.08, 14.34)         | 701.14 (675.16, 727.12)    |
| <i>P</i> -trend                                           | 0.47                         | 0.86                        | 0.02                         | <0.001                     |
| <b>Work or Volunteer Schedule</b>                         |                              |                             |                              |                            |
| No regular schedule                                       | 2136.10 (2033.40, 2238.80)   | 1290.59 (1234.76, 1346.42)  | 14.30 (14.17, 14.44)         | 670.87 (644.51, 697.23)    |

|                                             |                            |                            |                      |                          |
|---------------------------------------------|----------------------------|----------------------------|----------------------|--------------------------|
| Regular schedule                            | 2273.38 (2146.65, 2400.10) | 1338.33 (1269.44, 1407.22) | 14.30 (14.13, 14.46) | 669.59 (637.06, 702.12)  |
| <i>P</i> -trend                             | 0.10                       | 0.30                       | 0.97                 | 0.95                     |
| <b>Martial Status</b>                       |                            |                            |                      |                          |
| Married/in married-like relationship        | 2295.88 (2179.50, 2412.27) | 1364.08 (1300.81, 1427.35) | 14.23 (14.08, 14.38) | 713.25 (683.38, 743.12)  |
| Unmarried                                   | 2077.55 (1956.32, 2198.79) | 1250.95 (1185.04, 1316.85) | 14.38 (14.22, 14.53) | 624.20 (593.08, 655.32)  |
| <i>P</i> -trend                             | 0.02                       | 0.02                       | 0.23                 | <0.001                   |
| <b>Self-reported Health Status</b>          |                            |                            |                      |                          |
| Good or fair                                | 2113.41 (1978.56, 2248.26) | 1264.65 (1191.34, 1337.96) | 14.41 (14.23, 14.58) | 666.58 (631.97, 701.20)  |
| Excellent or very good                      | 2238.17 (2134.47, 2341.87) | 1337.16 (1280.78, 1393.54) | 14.23 (14.10, 14.37) | 672.68 (646.06, 699.30)  |
| <i>P</i> -trend                             | 0.17                       | 0.14                       | 0.13                 | 0.79                     |
| <b>Number of multimorbidities (0-13)***</b> |                            |                            |                      |                          |
| None (reference)                            | 2222.83 (2023.03, 2422.62) | 1333.30 (1224.67, 1441.92) | 14.21 (13.95, 14.47) | 716.01 (664.79, 767.23)  |
| 1                                           | 2240.31 (2105.83, 2374.78) | 1331.98 (1258.86, 1405.09) | 14.22 (14.05, 14.40) | 670.58 (636.10, 705.06)  |
| 2                                           | 2160.80 (2016.38, 2305.22) | 1291.40 (1212.88, 1369.92) | 14.44 (14.26, 14.63) | 647.18 (610.16, 684.21)* |
| 3+                                          | 2111.83 (1915.62, 2308.03) | 1273.48 (1166.80, 1380.16) | 14.30 (14.04, 14.55) | 667.54 (617.24, 717.84)  |
| <i>P</i> -trend                             | 0.31                       | 0.33                       | 0.28                 | 0.14                     |
| <b>Smoking Status</b>                       |                            |                            |                      |                          |
| Never smoked                                | 2163.29 (2056.01, 2270.57) | 1291.96 (1233.64, 1350.28) | 14.35 (14.22, 14.49) | 659.94 (632.40, 687.47)  |
| Current or past smoker                      | 2225.15 (2104.68, 2345.62) | 1331.71 (1266.22, 1397.20) | 14.24 (14.08, 14.39) | 683.43 (652.51, 714.36)  |
| <i>P</i> -trend                             | 0.46                       | 0.38                       | 0.27                 | 0.27                     |

532 One model, adjusted by clinic site and all descriptive visted

533 For predictors with >2 categories, a p-trend was calculated, looking for a linear trend across the categories.

534 Categories were also compared to the reference category.

535 The symbols represent the p-value for the comparison of this category to the reference category.

536 Symbols: \*= p-value<0.05; \*\*= p-value<0.01; \*\*\*= p-value<0.001

537 \*\*\* Mutimorbidity index includes arthritis, cancer (excluding nonmelanoma skin cancer), atrial fibrillation, chronic  
538 kidney disease, chronic obstructive pulmonary disease, heart congestive heart failure, dementia, depression, diabetes  
539 mellitus, osteoporosis, stroke and aortic stenosis

540

541

542 **Supplemental Table 2B:** Associations of descriptive variables with parametric rest-activity rhythm  
 543 parameters. Multivariable adjusted means (95% CI).

| Descriptive                                               | Nonparametric                    |                                    |                           |                               |                                        |
|-----------------------------------------------------------|----------------------------------|------------------------------------|---------------------------|-------------------------------|----------------------------------------|
|                                                           | Interdaily stability (range 0-1) | Intradaily variability (range 0-2) | L5: counts/min            | M10: counts/min               | Relative amplitude ((M10-L5)/(M10+L5)) |
| <b>Age (yrs)</b>                                          |                                  |                                    |                           |                               |                                        |
| 70-74 (reference)                                         | 0.57 (0.56, 0.58)                | 0.88 (0.86, 0.91)                  | 158.89 (147.23, 170.56)   | 2332.11 (2268.07, 2396.15)    | 0.87 (0.86, 0.87)                      |
| 75-79                                                     | 0.59 (0.57, 0.60)                | 0.86 (0.84, 0.89)                  | 146.36 (132.32, 160.40)   | 2265.65 (2188.54, 2342.75)    | 0.87 (0.86, 0.88)                      |
| 80-84                                                     | 0.57 (0.55, 0.59)                | 0.97 (0.93, 1.01)***               | 136.80 (116.77, 156.84)   | 1980.20 (1870.21, 2090.19)*** | 0.86 (0.85, 0.88)                      |
| 85+                                                       | 0.60 (0.57, 0.63)                | 0.94 (0.88, 0.99)                  | 164.04 (136.21, 191.88)   | 2083.66 (1930.83, 2236.50)**  | 0.86 (0.84, 0.88)                      |
| <i>P</i> -trend                                           | 0.17                             | 0.002                              | 0.37                      | <0.001                        | 0.87                                   |
| <b>Sex</b>                                                |                                  |                                    |                           |                               |                                        |
| Males                                                     | 0.55 (0.54, 0.56)                | 0.92 (0.90, 0.95)                  | 157.48 (144.84, 170.12)   | 2003.52 (1933.94, 2073.09)    | 0.85 (0.84, 0.86)                      |
| Females                                                   | 0.60 (0.59, 0.61)                | 0.87 (0.85, 0.90)                  | 148.19 (137.62, 158.76)   | 2406.38 (2348.21, 2464.55)    | 0.88 (0.87, 0.89)                      |
| <i>P</i> -value                                           | <0.001                           | 0.005                              | 0.29                      | <0.001                        | <0.001                                 |
| <b>Race</b>                                               |                                  |                                    |                           |                               |                                        |
| White                                                     | 0.58 (0.58, 0.59)                | 0.90 (0.88, 0.92)                  | 145.90 (137.47, 154.32)   | 2247.81 (2201.43, 2294.19)    | 0.87 (0.87, 0.88)                      |
| Non-White                                                 | 0.55 (0.53, 0.57)                | 0.87 (0.82, 0.91)                  | 189.04 (167.93, 210.14)   | 2178.48 (2062.34, 2294.62)    | 0.83 (0.82, 0.85)                      |
| <i>P</i> -trend                                           | 0.01                             | 0.13                               | <0.001                    | 0.28                          | <0.001                                 |
| <b>Education Level</b>                                    |                                  |                                    |                           |                               |                                        |
| High school or less or other                              | 0.58 (0.56, 0.61)                | 0.86 (0.82, 0.90)**                | 169.24 (148.56, 189.92)   | 2336.96 (2223.14, 2450.78)*   | 0.86 (0.84, 0.87)                      |
| Some college                                              | 0.59 (0.57, 0.61)                | 0.85 (0.82, 0.89)***               | 151.25 (134.64, 167.85)   | 2285.17 (2193.80, 2376.55)    | 0.87 (0.86, 0.89)                      |
| College Graduate                                          | 0.57 (0.56, 0.59)                | 0.92 (0.89, 0.95)                  | 151.54 (136.06, 167.03)   | 2190.20 (2104.99, 2275.40)    | 0.86 (0.85, 0.87)                      |
| Post College Graduate (reference)                         | 0.58 (0.56, 0.59)                | 0.92 (0.89, 0.95)                  | 146.02 (132.83, 159.21)   | 2201.78 (2129.21, 2274.35)    | 0.87 (0.86, 0.88)                      |
| <i>P</i> -trend                                           | 0.41                             | 0.001                              | 0.11                      | 0.03                          | 0.44                                   |
| <b>How well money takes care of needs at end of month</b> |                                  |                                    |                           |                               |                                        |
| Refused/Poorly                                            | 0.54 (0.50, 0.58)**              | 0.94 (0.87, 1.02)                  | 172.08 (134.35, 209.81)   | 2009.18 (1801.37, 2217.00)**  | 0.84 (0.81, 0.87)*                     |
| Fairly well                                               | 0.56 (0.54, 0.57)***             | 0.90 (0.87, 0.93)                  | 170.06 (155.52, 184.61)** | 2140.39 (2060.31, 2220.48)*** | 0.85 (0.84, 0.86)***                   |
| Very well (reference)                                     | 0.59 (0.58, 0.60)                | 0.89 (0.87, 0.91)                  | 142.15 (132.23, 152.07)   | 2299.90 (2245.27, 2354.53)    | 0.88 (0.87, 0.89)                      |
| <i>P</i> -trend                                           | <0.001                           | 0.23                               | 0.003                     | <0.001                        | <0.001                                 |
| <b>Work or Volunteer Schedule</b>                         |                                  |                                    |                           |                               |                                        |

|                                             |                   |                   |                         |                            |                   |
|---------------------------------------------|-------------------|-------------------|-------------------------|----------------------------|-------------------|
| No regular schedule                         | 0.59 (0.57, 0.60) | 0.90 (0.88, 0.92) | 147.54 (137.48, 157.61) | 2218.00 (2162.58, 2273.41) | 0.87 (0.86, 0.88) |
| Regular schedule                            | 0.57 (0.56, 0.59) | 0.88 (0.86, 0.91) | 158.93 (146.51, 171.35) | 2267.96 (2199.58, 2336.33) | 0.86 (0.86, 0.87) |
| <i>P</i> -trend                             | 0.13              | 0.20              | 0.17                    | 0.27                       | 0.49              |
| <b>Martial Status</b>                       |                   |                   |                         |                            |                   |
| Married/in married-like relationship        | 0.60 (0.59, 0.61) | 0.90 (0.88, 0.92) | 138.17 (126.76, 149.58) | 2322.14 (2259.35, 2384.94) | 0.88 (0.88, 0.89) |
| Unmarried                                   | 0.56 (0.54, 0.57) | 0.89 (0.87, 0.91) | 167.04 (155.16, 178.93) | 2147.19 (2081.77, 2212.60) | 0.85 (0.84, 0.86) |
| <i>P</i> -trend                             | <0.001            | 0.60              | 0.001                   | <0.001                     | <0.001            |
| <b>Self-reported Health Status</b>          |                   |                   |                         |                            |                   |
| Good or fair                                | 0.58 (0.56, 0.59) | 0.90 (0.87, 0.92) | 158.39 (145.17, 171.61) | 2172.92 (2100.16, 2245.68) | 0.86 (0.85, 0.87) |
| Excellent or very good                      | 0.58 (0.57, 0.59) | 0.89 (0.87, 0.91) | 148.20 (138.04, 158.37) | 2277.73 (2221.78, 2333.69) | 0.87 (0.87, 0.88) |
| <i>P</i> -trend                             | 0.82              | 0.72              | 0.25                    | 0.03                       | 0.02              |
| <b>Number of multimorbidities (0-13)***</b> |                   |                   |                         |                            |                   |
| None (reference)                            | 0.60 (0.57, 0.62) | 0.87 (0.83, 0.91) | 147.75 (128.19, 167.32) | 2277.13 (2169.30, 2384.95) | 0.87 (0.86, 0.89) |
| 1                                           | 0.57 (0.56, 0.59) | 0.91 (0.89, 0.94) | 160.03 (146.86, 173.19) | 2253.07 (2180.50, 2325.65) | 0.86 (0.85, 0.87) |
| 2                                           | 0.58 (0.56, 0.59) | 0.89 (0.86, 0.92) | 150.39 (136.24, 164.53) | 2219.91 (2141.97, 2297.85) | 0.87 (0.86, 0.88) |
| 3+                                          | 0.58 (0.56, 0.60) | 0.90 (0.86, 0.93) | 142.91 (123.70, 162.13) | 2201.33 (2095.44, 2307.21) | 0.87 (0.86, 0.89) |
| <i>P</i> -trend                             | 0.69              | 0.71              | 0.47                    | 0.27                       | 0.69              |
| <b>Smoking Status</b>                       |                   |                   |                         |                            |                   |
| Never smoked                                | 0.58 (0.56, 0.59) | 0.90 (0.88, 0.92) | 150.18 (139.66, 160.69) | 2224.43 (2166.55, 2282.32) | 0.87 (0.86, 0.88) |
| Current or past smoker                      | 0.59 (0.57, 0.60) | 0.89 (0.86, 0.91) | 154.46 (142.65, 166.27) | 2254.75 (2189.75, 2319.75) | 0.87 (0.86, 0.88) |
| <i>P</i> -trend                             | 0.19              | 0.39              | 0.60                    | 0.50                       | 0.71              |

544 One model, adjusted by clinic site and all descriptive visted.

545 L5: Avg activity of the 5 consecutive hours with least activity

546 M10: Avg activity of the 10 consecutive hours with most activity

547 For predictors with >2 categories, a p-trend was calculated, looking for a linear trend across the categories.

548 Categories were also compared to the reference category.

549 The symbols represent the p-value for the comparison of this category to the reference category.

550 Symbols: \* = p-value<0.05; \*\* = p-value<0.01; \*\*\* = p-value<0.001

551 \*\*\* Mutimorbidity index includes arthritis, cancer (excluding nonmelanoma skin cancer), atrial fibrillation, chronic

552 kidney disease, chronic obstructive pulmonary disease, heart congestive heart failure, dementia, depression, diabetes

553 mellitus, osteoporosis, stroke and aortic stenosis

554 **Supplemental Table 2C:** Associations of descriptive variables with fPCA parameters. Multivariable  
 555 adjusted means (95% CI).

|                                                           | <b>Shape-naïve functional principal components</b> |                                 |                               |                                |
|-----------------------------------------------------------|----------------------------------------------------|---------------------------------|-------------------------------|--------------------------------|
| <b>Descriptive</b>                                        | <b>fPCA Component 1</b>                            | <b>fPCA Component 2</b>         | <b>fPCA Component 3</b>       | <b>fPCA Component 4</b>        |
| <b>Age (yrs)</b>                                          |                                                    |                                 |                               |                                |
| 70-74<br>(reference)                                      | 2256.35 (497.16,<br>4015.54)                       | -166.11 (-1301.35,<br>969.13)   | -305.62 (-1042.40,<br>431.17) | -121.13 (-728.43,<br>486.17)   |
| 75-79                                                     | 621.80 (-1496.14,<br>2739.74)                      | 1348.26 (-18.48,<br>2715.01)    | -219.81 (-1106.85,<br>667.23) | -566.13 (-1297.28,<br>165.02)  |
| 80-84                                                     | -6268.84 (-9290.14, -<br>3247.53)***               | -1455.78 (-3405.49,<br>493.93)  | -335.64 (-1601.03,<br>929.75) | 836.49 (-206.52,<br>1879.49)   |
| 85+                                                       | -3875.73 (-8073.82,<br>322.36)**                   | -1462.68 (-4171.79,<br>1246.43) | 880.15 (-878.11,<br>2638.40)  | 662.27 (-786.97,<br>2111.52)   |
| <i>P</i> -trend                                           | <0.001                                             | 0.31                            | 0.41                          | 0.16                           |
| <b>Sex</b>                                                |                                                    |                                 |                               |                                |
| Males                                                     | -6568.04 (-8476.85, -<br>4659.23)                  | -1167.27 (-2399.17,<br>64.63)   | 172.23 (-624.66,<br>969.12)   | -248.97 (-906.98,<br>409.03)   |
| Females                                                   | 4647.95 (3051.99,<br>6243.90)                      | 840.75 (-189.25,<br>1870.74)    | -446.06 (-1112.34,<br>220.22) | 93.82 (-456.34,<br>643.98)     |
| <i>P</i> -value                                           | <0.001                                             | 0.02                            | 0.26                          | 0.45                           |
| <b>Race</b>                                               |                                                    |                                 |                               |                                |
| White                                                     | 187.44 (-1085.04,<br>1459.92)                      | 41.65 (-779.58,<br>862.88)      | -356.90 (-888.14,<br>174.33)  | -155.79 (-594.44,<br>282.86)   |
| Non-White                                                 | -1422.58 (-4608.94,<br>1763.78)                    | -242.93 (-2299.33,<br>1813.48)  | 826.17 (-504.07,<br>2156.42)  | 585.95 (-512.45,<br>1684.36)   |
| <i>P</i> -trend                                           | 0.36                                               | 0.80                            | 0.11                          | 0.22                           |
| <b>Education Level</b>                                    |                                                    |                                 |                               |                                |
| High school or<br>less or other                           | 2251.14 (-871.33,<br>5373.61)                      | 622.63 (-1391.14,<br>2636.40)   | -737.37 (-2041.76,<br>567.03) | -464.99 (-1541.98,<br>612.00)  |
| Some college                                              | 1183.77 (-1323.04,<br>3690.58)                     | 855.06 (-761.65,<br>2471.78)    | -200.60 (-1247.80,<br>846.61) | -18.99 (-883.63,<br>845.65)    |
| College<br>Graduate                                       | -1364.14 (-3701.68,<br>973.39)                     | -1028.23 (-2535.77,<br>479.31)  | -317.21 (-1293.70,<br>659.28) | -191.11 (-997.36,<br>615.14)   |
| Post College<br>Graduate<br>(reference)                   | -807.60 (-2798.51,<br>1183.31)                     | -57.19 (-1341.18,<br>1226.81)   | 136.93 (-694.76,<br>968.63)   | 200.96 (-485.74,<br>887.65)    |
| <i>P</i> -trend                                           | 0.07                                               | 0.39                            | 0.31                          | 0.37                           |
| <b>How well money takes care of needs at end of month</b> |                                                    |                                 |                               |                                |
| Refused/Poorly                                            | -6415.87 (-12116.41, -<br>715.33)**                | 1262.82 (-2414.25,<br>4939.88)  | 576.48 (-1803.46,<br>2956.42) | -243.63 (-2209.11,<br>1721.85) |
| Fairly well                                               | -3273.47 (-5470.32, -<br>1076.63)***               | 1497.26 (80.21,<br>2914.30)*    | -219.65 (-1136.82,<br>697.52) | -178.51 (-935.95,<br>578.94)   |
| Very well<br>(reference)                                  | 1929.48 (430.98,<br>3427.98)                       | -797.12 (-1763.71,<br>169.47)   | -224.48 (-850.10,<br>401.14)  | 25.06 (-491.61,<br>541.73)     |
| <i>P</i> -trend                                           | <0.001                                             | 0.02                            | 0.70                          | 0.66                           |
| <b>Work or Volunteer Schedule</b>                         |                                                    |                                 |                               |                                |
| No regular<br>schedule                                    | -670.62 (-2190.94,<br>849.70)                      | -1.01 (-982.19,<br>980.17)      | -340.09 (-974.79,<br>294.62)  | 136.29 (-387.80,<br>660.37)    |

|                                             |                              |                             |                             |                            |
|---------------------------------------------|------------------------------|-----------------------------|-----------------------------|----------------------------|
| Regular schedule                            | 906.05 (-969.90, 2781.99)    | 3.77 (-1206.92, 1214.47)    | 43.41 (-739.76, 826.59)     | -330.68 (-977.36, 315.99)  |
| <i>P</i> -trend                             | 0.20                         | 1.00                        | 0.46                        | 0.28                       |
| <b>Martial Status</b>                       |                              |                             |                             |                            |
| Married/in married-like relationship        | 2237.75 (514.89, 3960.60)    | 179.32 (-932.57, 1291.21)   | -686.66 (-1405.92, 32.60)   | -79.24 (-673.14, 514.67)   |
| Unmarried                                   | -2498.11 (-4292.79, -703.44) | -191.15 (-1349.40, 967.09)  | 349.83 (-399.41, 1099.07)   | -17.61 (-636.27, 601.05)   |
| <i>P</i> -trend                             | <0.001                       | 0.67                        | 0.06                        | 0.89                       |
| <b>Self-reported Health Status</b>          |                              |                             |                             |                            |
| Good or fair                                | -1915.80 (-3912.03, 80.44)   | 1063.68 (-224.65, 2352.00)  | -660.93 (-1494.31, 172.46)  | 152.29 (-535.85, 840.43)   |
| Excellent or very good                      | 1105.71 (-429.42, 2640.85)   | -651.12 (-1641.86, 339.62)  | 103.00 (-537.88, 743.89)    | -173.39 (-702.58, 355.81)  |
| <i>P</i> -trend                             | 0.02                         | 0.05                        | 0.17                        | 0.48                       |
| <b>Number of multimorbidities (0-13)***</b> |                              |                             |                             |                            |
| None (reference)                            | 586.97 (-2371.12, 3545.06)   | -159.37 (-2065.94, 1747.21) | -1328.10 (-2562.26, -93.95) | -654.70 (-1672.16, 362.76) |
| 1                                           | 444.25 (-1546.75, 2435.24)   | -640.63 (-1923.88, 642.62)  | -149.79 (-980.46, 680.88)   | 6.71 (-678.11, 691.52)     |
| 2                                           | -364.98 (-2503.20, 1773.23)  | 888.70 (-489.44, 2266.84)   | 113.62 (-778.47, 1005.72)   | 443.19 (-292.27, 1178.64)  |
| 3+                                          | -1068.71 (-3973.70, 1836.27) | -104.13 (-1976.48, 1768.21) | 286.05 (-925.95, 1498.04)   | -460.71 (-1459.90, 538.48) |
| <i>P</i> -trend                             | 0.36                         | 0.50                        | 0.08                        | 0.60                       |
| <b>Smoking Status</b>                       |                              |                             |                             |                            |
| Never smoked                                | -366.11 (-1954.20, 1221.98)  | 544.94 (-479.98, 1569.86)   | -77.97 (-740.97, 585.02)    | 125.81 (-421.64, 673.25)   |
| Current or past smoker                      | 361.94 (-1421.37, 2145.24)   | -681.50 (-1832.41, 469.41)  | -324.79 (-1069.29, 419.70)  | -269.51 (-884.25, 345.24)  |
| <i>P</i> -trend                             | 0.55                         | 0.12                        | 0.63                        | 0.35                       |

556 One model, adjusted by clinic site and all descriptive variables listed.

557 For predictors with >2 categories, a *p*-trend was calculated, looking for a linear trend across the  
558 categories. Categories were also compared to the reference category.

559 The symbols represent the *p*-value for the comparison of this category to the reference category

560 Symbols: \*= *p*-value<0.05; \*\*= *p*-value<0.01; \*\*\*= *p*-value<0.001

561 \*\*\* Mutimorbidity index includes arthritis, cancer (excluding nonmelanoma skin cancer), atrial  
562 fibrillation, chronic kidney disease, chronic obstructive pulmonary disease, heart disease,  
563 congestive heart failure, dementia, depression, diabetes mellitus, osteoporosis, stroke and aortic  
564 stenosis.

565

566

567

568 **Supplemental Figure 1**

569 **Title:** Graphical representations of low IS vs high IS, as well as low IV vs. high IV, from  
570 rest-activity rhythm profiles.

571 **Caption:** Comparison of representative rest-activity rhythm plots of individual  
572 participants from the lowest 10<sup>th</sup> percentile IS (Panel A) versus highest 10<sup>th</sup> percentile IS  
573 (Panel B). Comparison of representative rest-activity rhythms of individual participants  
574 from the lowest decile IV (Panel C) versus the highest decile values for IV (Panel D) to  
575 graphically show variance in rhythmic stability across the 8-day period. Each plot point  
576 represents an activity count.



**A. Participant with low IS**

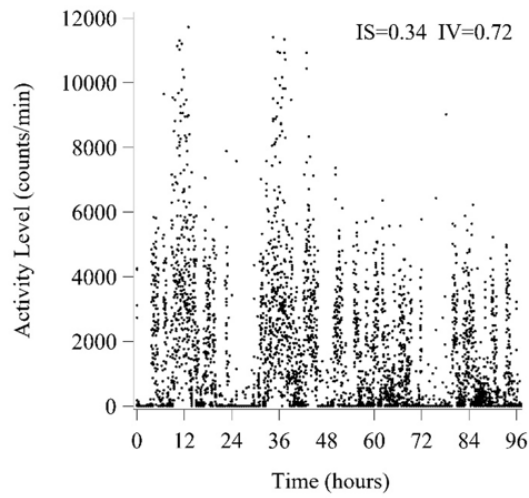

**B. Participant with high IS**

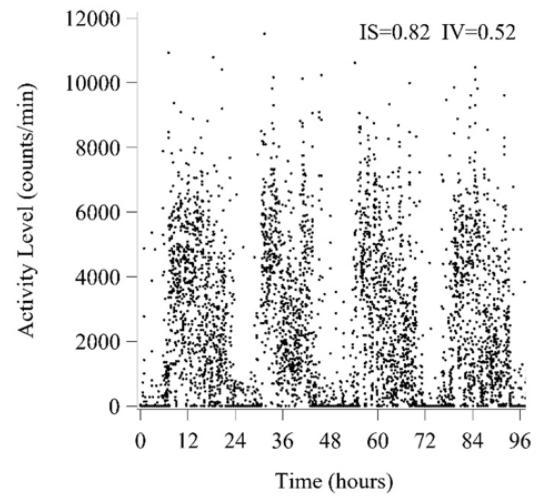

**C. Participant with low IV**

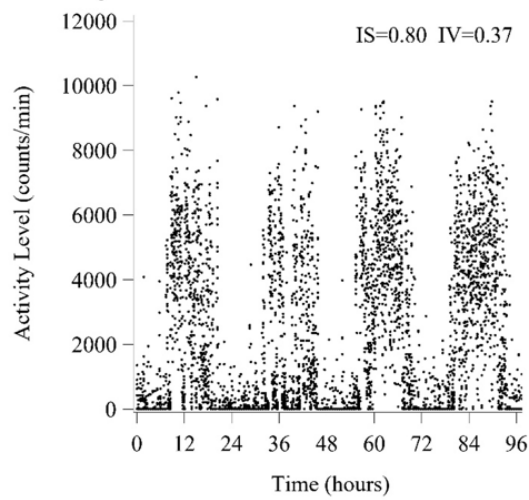

**D. Participant with high IV**

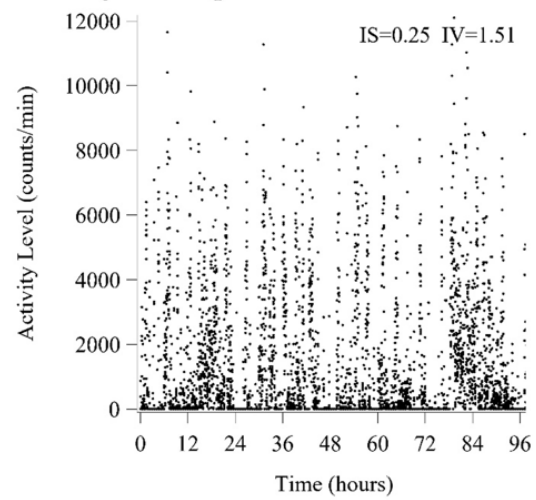

579 **Supplemental Figure 2**

580 **Title:** Unadjusted correlations of rest-activity rhythm parameters.

581 **Caption:** Correlations matrix between RAR rhythms, revealing generally good  
 582 agreement between parametric vs. non-parametric variables.

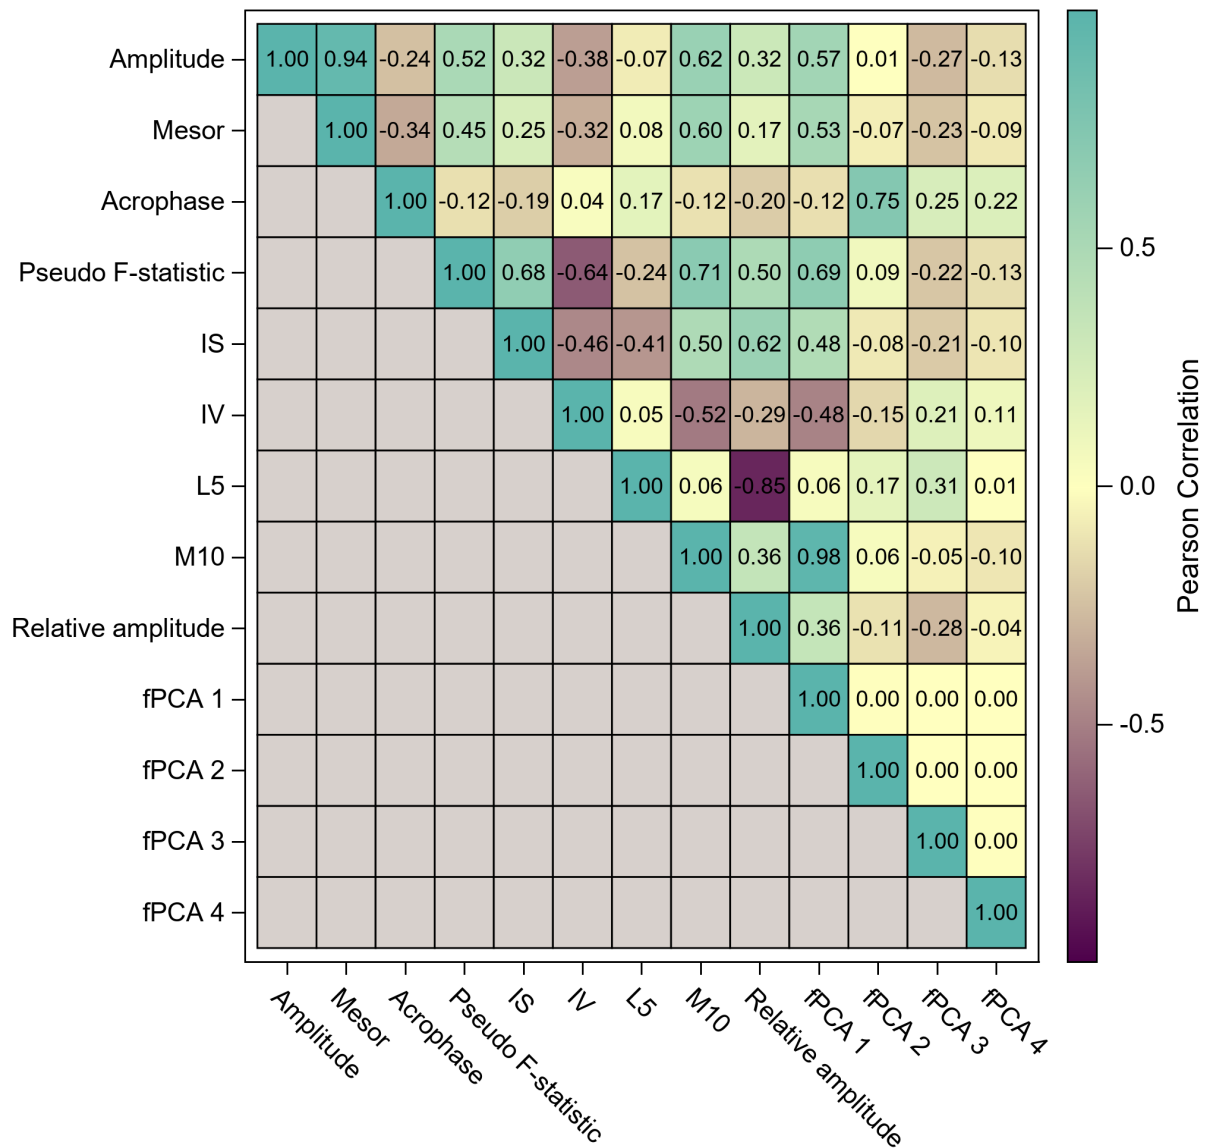

583

584

585
